1           **Metabolic potential and survival strategies of microbial communities across**  
2           **extreme temperature gradients on Deception Island volcano, Antarctica**

3  
4           Amanda Gonçalves Bendia<sup>1\*</sup>, Leandro Nascimento Lemos<sup>2</sup>, Lucas William Mendes<sup>2</sup>, Camila  
5           Negrão Signori<sup>1</sup>, Brendan J. M. Bohannan<sup>3</sup>, Vivian Helena Pellizari<sup>1</sup>

6  
7           <sup>1</sup>Departamento de Oceanografia Biológica, Instituto Oceanográfico, Universidade de São Paulo  
8           (USP). Praça do Oceanográfico, 191. CEP: 05508-900 São Paulo, SP, Brazil.

9           <sup>2</sup>Laboratório de Biologia Celular e Molecular, Centro de Energia Nuclear na Agricultura,  
10           Universidade de São Paulo. Avenida Centenário 303, CEP 13416-00 Piracicaba, SP, Brazil.

11           <sup>3</sup>Department of Biology, Institute of Ecology and Evolution, University of Oregon, Eugene, OR,  
12           United States

13  
14           \*Corresponding author:

15           Amanda Gonçalves Bendia

16           Address: Departamento de Oceanografia Biológica, Instituto Oceanográfico, Universidade de São  
17           Paulo, São Paulo, Brazil. Praça do Oceanográfico, 191. CEP: 05508-900 São Paulo, SP, Brazil.

18           Email: amandagb@usp.br

19           Phone number: +55 (11) 3091-6557

20  
21           **Running Title:** Community survival strategies on Deception Island

22  
23  
24  
25  
26  
27  
28  
29  
30  
31

32 **Abstract**

33 Active volcanoes in Antarctica, in contrast to the rest of the icy landscape, have remarkable  
34 temperature and geochemical gradients that could select for a wide variety of microbial adaptive  
35 mechanisms and metabolic pathways. Deception Island is a stratovolcano flooded by the sea,  
36 resulting in contrasting ecosystems such as permanent glaciers (<0 °C) and active fumaroles (up  
37 to 100 °C). Steep gradients in temperature, salinity and geochemistry over very short distances  
38 have been reported for Deception Island, and have been shown to effect microbial community  
39 structure and diversity. However, little is known regarding how these gradients affect ecosystem  
40 functioning, for example due to inhibition of key metabolic enzymes or pathways. In this study,  
41 we used shotgun metagenomics and metagenome-assembled genomes to explore how microbial  
42 functional diversity is shaped by extreme geochemical, salinity and temperature gradients in  
43 fumarole and glacier sediments. We observed that microbial communities from a 98 °C fumarole  
44 harbor specific hyperthermophilic molecular strategies, as well as reductive and autotrophic  
45 pathways, while those from <80 °C fumaroles possess more diverse metabolic and survival  
46 strategies capable of responding to fluctuating redox and temperature conditions. In contrast,  
47 glacier communities showed less diverse metabolic potentials, comprising mainly heterotrophic  
48 and carbon pathways. Through the reconstruction of genomes, we were able to clarify putative  
49 novel lifestyles of underrepresented taxonomic groups, especially those related to Nanoarchaeota  
50 and thermophilic ammonia-oxidizing archaeal lineages. Our results enhance understanding of the  
51 metabolic and survival capabilities of different extremophilic lineages of Bacteria and Archaea.

52

53 **Key words:** Deception Island, Antarctica, Microbial ecology, Microbial processes, Metagenome-  
54 assembled genomes, Extremophiles

## 55 **Introduction**

56 The study of life in extreme environments has long fascinated biologists. Understanding how life  
57 persists at environmental extremes provides insight into how living systems function, as well as  
58 providing a unique window into the evolutionary history of life itself (Merino et al., 2019). The  
59 Deception Island volcano contains a unique combination of extreme temperatures and geochemical  
60 energy sources that together have the potential for selecting a wide variety of microbial adaptive  
61 mechanisms and metabolic pathways. Deception Island is located in the South Shetland Islands at  
62 the spreading center of the Bransfield Strait marginal basin, which harbors contrasting ecosystems  
63 of permanent glaciers and active fumaroles with continuous emissions of gases, mostly carbon  
64 dioxide and hydrogen sulfide (Somoza et al., 2004). This combination of glaciers and fumaroles  
65 is produced by the interaction between the cryosphere and water mass contact with hot ascending  
66 magmas (Geyer et al., 2019). Unlike Antarctic continental volcanoes, Deception Island fumaroles  
67 reach up to 100 °C and have direct marine influence, creating a remarkable combination of thermal,  
68 geochemical and salinity gradients (Bartolini et al., 2014; Herbold et al., 2014; Muñoz-Martín et  
69 al., 2005).

70

71 While early research carried out on Deception focused primarily on obtaining bacterial isolates  
72 from hot or cold ecosystems (e.g. Carrión et al., 2011; Llarch et al., 1997; Stanley et al., 1967), a  
73 more recent study was able to recover both psychrophilic and thermophilic isolates among the  
74 steep temperature gradients (Bendia et al., 2018a). Previous molecular studies described microbial  
75 diversity on Deception fumaroles using DGGE (Amenábar et al., 2013; Muñoz et al., 2011) and  
76 shotgun metagenomics to characterize the resistome profiles in cold sediments from Whalers Bay

77 (Centurion et al., 2019). These previous studies were limited with respect to sampling depth and  
78 extent since only fumaroles or cold sediments were analyzed.

79

80 Two previous studies have focused on understanding the effect of Deception temperature gradients  
81 on microbial communities. The first, performed by our group, focused on determining taxonomic  
82 diversity through 16S rRNA gene sequencing (Bendia et al., 2018b), and a second study applied  
83 the Life Detector Chip (LDChip) to describe general functions of communities from Cerro Caliente  
84 (Lezcano et al., 2019). Our previous study showed that the steep gradients on Deception were able  
85 to select a unique combination of taxonomic groups found in deep and shallow hydrothermal vents  
86 (including hyperthermophilic Archaea, such as *Pyrodictium spp.*), geothermal systems and those  
87 typical from polar ecosystems (Bendia et al., 2018b). Also we reported that the bacterial  
88 community structure on Deception Island is strongly niche driven by a variety of environmental  
89 parameters (temperature, pH, salinity and volcanic geochemicals, such as sulfate), while archaeal  
90 diversity is mainly shaped by temperature (Bendia et al., 2018b). These previous studies, however,  
91 did not address the linkages between microbial structure and their adaptive and metabolic  
92 strategies over the particular environmental gradients found on Deception Island.

93

94 Although several studies have demonstrated that temperature is a primary driver of microbial  
95 taxonomic diversity in different geothermal and hydrothermal ecosystems (e.g. Antranikian et al.,  
96 2017; Price and Giovannelli, 2017; Sharp et al., 2014; Ward et al., 2017), it is still unclear to what  
97 extent temperature affects the functional processes of a microbial community, such as their  
98 adaptive mechanisms and metabolic pathways. The majority of these previous studies have  
99 focused on nonpolar thermal ecosystems, where the temperature range is narrower than in polar

100 volcanoes; the exception is a study of deep-sea hydrothermal vents, in which the contrasting  
101 temperatures are created by the contact of heat with the surrounding cold seawater (with  
102 temperatures 0-4 °C). Indeed, the Deception communities from fumaroles have similar members  
103 (Bendia et al., 2018b) to those found in deep-sea hydrothermal vents (e.g. Dick, 2019; Nakagawa  
104 et al., 2006; Takai et al., 2001), which suggests that, regarding differences in pressure (and other  
105 environmental effects), the wide temperature range typical of polar volcanoes and deep-sea  
106 hydrothermal vents can act as a strong selective pressure that favors (hyper)thermophilic  
107 specialists capable of thriving in high temperatures but that can also tolerate the cold surroundings.

108

109 Furthermore, there is controversy about the impact of extreme environments on microbe-microbe  
110 interactions. Although some studies have reported a decrease in the frequency of microbe-microbe  
111 interactions inferred from co-occurrence patterns (Cole et al., 2013; Merino et al., 2019; Sharp et  
112 al., 2014), others have observed the opposite trend (Lin et al., 2016; Mandakovic et al., 2018). The  
113 analysis of co-occurrence patterns is useful for examining the nature of the ecological  
114 rearrangements that take place in a microbial community facing contrasting environments (Freilich  
115 et al., 2010; Mandakovic et al., 2018).

116

117 In the current study, we assessed the microbial functional profile in fumarole and glacier sediments  
118 from two geothermal sites on the Deception Island volcano, Antarctica. For this, we performed  
119 shotgun metagenomics to unveil functional diversity and reconstructed genomes to reveal the  
120 microbes' putative lifestyles and survival capabilities, combining the genomic information with  
121 community functional profiles. Here, we hypothesize that (i) similar to what has been reported for  
122 community diversity, survival and metabolic strategies are also influenced by the combination of

123 geochemical, salinity and extreme temperature gradients; (ii) these communities follow the  
124 redundancy of metabolic potential that was reported for deep-sea hydrothermal vent communities;  
125 and (iii) microbe-microbe interactions decrease with increasing temperature. This study adds  
126 important information regarding the ecological processes of microbial communities inhabiting a  
127 steep gradient of temperature, and addresses central questions regarding the functional adaptability  
128 of extremophiles in polar regions.

129

130

## 131 **Materials and methods**

### 132 **Study site and sampling strategy**

133 Deception Island (62°58' S, 60°39' W) is a complex stratovolcano located in the South Shetland  
134 Islands, Bransfield Strait, near the Antarctic Peninsula. A past eruption occurring approximately  
135 10,000 years ago collapsed the central part of the island giving rise to a flooded caldera called Port  
136 Foster Bay, 9 km in diameter (Baker et al., 1975). Fumaroles are found mainly at Fumarole Bay  
137 (FB), Whalers Bay (WB), and Pendulum Cove (Fermani et al., 2007; Geyer et al., 2019), and they  
138 are distributed mostly in submerged and partially submerged regions (intertidal zones), with  
139 temperatures varying from 40-60°C in WB and 80-100°C in FB (Rey et al., 1995; Somoza et al.,  
140 2004). Carbon dioxide and hydrogen sulfide gases are emitted by fumaroles and are oxidized to  
141 products such as sulfite and sulfate (Somoza et al., 2004; Zhang and Millero, 1993).

142

143 Sampling was performed during the XXXII Brazilian Antarctic Expedition (December 2013 to  
144 January 2014), with logistical support from the polar vessel NPo. Almirante Maximiano. We  
145 collected surface sediment samples (*ca.* 5 cm) in fumaroles and glaciers at geothermally active

146 sites in FB (62°58'02.7" S, 60°42' 36.4" W) and WB (62°58'45.1" S, 60°33'27.3" W) (Figure 1a  
147 and 1b), with temperatures between 0 and 98 °C. At each site, we obtained samples from three  
148 different points within the temperature gradient, and triplicates were performed for each collected  
149 point, totaling 18 sediment samples. Points A and B were defined as samples collected in  
150 fumaroles, while point C samples were collected from the glacier, few cm below the glacier's edge  
151 (Figure 1c and 1d). The point FBA was the hottest fumarole, measuring 98 °C at the sediment  
152 surface (*ca.* 20 cm). Distances between fumaroles and glaciers at each site were approximately 15  
153 m, and the WB and FB transects were approximately 10 km apart. All fumaroles were in the  
154 intertidal zone, except for point B from FB, which was in the subtidal zone (submerged at 50 cm  
155 depth in the water column). Samples were stored at -20 °C until arrival at the University of São  
156 Paulo, Brazil in April 2014.

157

### 158 **DNA Extraction and metagenomic sequencing**

159 To compare our results with the study performed by Bendia et al. (2018b), we used the same  
160 dataset and DNA extractions as a template for the metagenomics. Due to low DNA mass even  
161 after several concentration efforts, extracted DNA was subjected to multiple displacement  
162 amplification (MDA) using the illustra GenomiPhi V2 DNA amplification kit (GE Healthcare,  
163 Piscataway, NJ, USA), following the manufacturer's instructions. Three amplification reactions  
164 per sample were pooled to obtain sufficient DNA for sequencing. DNA was then purified using  
165 AMPure XP beads kit (Beckman Coulter) following the manufacturer's instructions. Library  
166 constructions and shotgun metagenomic sequencing were conducted at "Laboratório Central de  
167 Tecnologias de Alto Desempenho em Ciências da Vida" (LaCTAD), Universidade Estadual de

168 Campinas State (UNICAMP), on the Illumina Hiseq 2000 platform using 2x100 bp paired-end  
169 system.

170

### 171 **Physical-chemical parameters**

172 To correlate biological and environmental data, we used the physical-chemical parameters for  
173 sediments measured by Bendia et al. (2018b), which included granulometry, electrical  
174 conductivity, humidity, micronutrients (B, Cu, Fe, Mn, and Zn), organic matter, organic carbon,  
175 pH, P, Si, Na, K, Ca, Mg, Al, total nitrogen, nitrate, ammonia, and sulfate.

176

### 177 **Taxonomic and functional inference of metagenomic reads**

178 Reads were quality trimmed using Sickle (Joshi and Fass, 2011) with phred >30 and then uploaded  
179 to MG-RAST (Keegan et al., 2016). Functional and taxonomic profiles of reads were generated  
180 through subsystem and best hit classifications using the SEED subsystem, M5NR (non-redundant  
181 protein database) and KEGG, available in MG-RAST (Aziz et al., 2008; Kanehisa and Goto, 2000;  
182 Keegan et al., 2016; Wilke et al., 2012), with the following parameters:  $1 \times 10^{-5}$  e-value, minimum  
183 50 bp alignment, and 60% identity. Data generated by MG-RAST were statistically analyzed using  
184 Statistical Analysis of Metagenomic Profiles (STAMP) software (Parks et al., 2014) and R  
185 software (R Development Core Team), using the packages *vegan* (Oksanen, 2007) and *ggplot*  
186 (Wickham, 2011). The *p* values were calculated using Fisher's exact two-sided test and the  
187 confidence intervals were calculated using the method of Newcombe-Wilson. Statistical  
188 comparisons were performed by grouping the samples according to environmental temperatures:  
189 glaciers, fumaroles up to 80 °C and fumarole at 98 °C. Principal component analysis (PCA)  
190 ordination was performed by using level 3 functions of SEED subsystems and then visualized in



191 STAMP software. Values were normalized to relative abundance for comparison of taxonomic  
192 composition across samples. In addition, Spearman correlations were performed to determine  
193 relationships between taxonomic and functional profiles and the environmental parameters.  
194 Genetic data are available in MG-RAST under the project ID mgp15628. MG-RAST IDs for each  
195 sample are described in Supplementary Table 2.

196  
197 To investigate the complexity of community interactions at each sampling site, we used co-  
198 occurrence network analysis. For this, non-random co-occurrence analyses were performed using  
199 the Python module ‘SparCC’ (Friedman and Alm, 2012). A table of frequency of hits affiliated to  
200 the genus level was used for analysis. For each network, we considered only strong (SparCC > 0.9  
201 or < -0.9) and highly significant ( $p < 0.01$ ) correlations between microbial taxa. The nodes in the  
202 reconstructed network represent taxa at the genus level, whereas the edges represent significantly  
203 positive or negative correlation between nodes. The analysis of network complexity was based on  
204 a set of measures, such as the number of nodes and edges, modularity, the number of communities,  
205 average node connectivity, average path length, diameter, and cumulative degree distribution  
206 (Newman, 2003). Network visualization and property measurements were calculated with the  
207 software Gephi (Bastian et al., 2009).

208

209

## 210 **Metagenomic assembly and genome reconstruction**

211 We used two different strategies for metagenomic assembly and genomic binning of the eighteen  
212 metagenomic datasets from Deception Island volcano. First, reads were assembled using IDBA-  
213 ud (Peng et al., 2012) (-mink 50, -maxk 92, -tep 4, -min\_contig 1000) and then genomic binning  
214 was performed through MaxBin 2.0 (Wu et al., 2016). Contigs were annotated using the Integrated

215 Microbial Genomes & Microbiomes (IMG/M) system (Markowitz et al., 2009) and archived on  
216 the JGI/IMG server under Project ID Gs0141992. IMG accession numbers for each sample are  
217 described in Supplementary Table 2.

218

219 Furthermore, reads were co-assembled using MEGAHIT v. 1.0.2. (Li et al., 2015), discarding  
220 contigs smaller than 1000 bp. Then contigs were binned using anvi'o v. 5 following the workflow  
221 described by Eren et al. (2015). Reads for each metagenome were mapped to the co-assembly  
222 using bowtie2 with default parameters (Langmead and Salzberg, 2012). A contig database was  
223 generated using the 'anvi-gen-contigs-database'. Prodigal (Hyatt et al., 2010) was used to predict  
224 open reading frames (ORFs). Single-copy bacterial and archaeal genes were identified using  
225 HMMER v. 3.1b2 (Finn et al., 2011). The program 'anvi-run-ncbi-cogs' was used to annotate  
226 genes with functions by searching for them against the December 2014 release of the Clusters of  
227 Orthologous Groups (COGs) database (Galperin et al., 2015) using blastp v2.10.0+ (Altschul et  
228 al., 1990). Predicted protein sequences were functionally and taxonomically annotated against  
229 KEGG with GhostKOALA (genus\_prokaryotes) (Kanehisa et al., 2016). Individual BAM files  
230 were profiled using the program 'anvi-profile' with a minimum contig length of 4 kbp. Genome  
231 binning was performed using CONCOCT (Alneberg et al., 2013) through the 'anvi-merge'  
232 program with default parameters. We used 'anvi-interactive' to visualize the merged data and  
233 identify genome bins. Bins were then manually refined using 'anvi-refine', and completeness and  
234 contamination were estimated using 'anvi-summarize'.

235

236 Bins generated by the assembly and co-assembly approaches were quality checked through  
237 CheckM v. 1.0.7 (Parks et al., 2015), which is based on the representation of lineage-specific

238 marker gene sets. Bins were taxonomically classified based on genome phylogeny using GTDB-  
239 Tk (Chaumeil et al., 2020).

240

## 241 **Taxonomic and functional annotation of metagenome-assembled genomes (MAGs)**

242 Bins were defined as a high-quality draft (>90% complete, <5% contamination), medium-quality  
243 draft (>50% complete, <10% contamination) or low-quality draft (<50% complete, <10%  
244 contamination) metagenome assembled-genome (MAG), according to genome quality standards  
245 suggested by Bowers et al. (2017). We selected 11 MAGs based on their medium or high-quality  
246 and taxonomy, preferably selecting groups related to extremophiles or associated to sulfur and  
247 nitrogen metabolisms. Annotation of all predicted ORFs in MAGs was performed using prokka  
248 v.14.5 (Seemann, 2014). Further, proteins were compared to sequences in the KEGG Database  
249 through GhostKOALA (genus\_prokaryotes) (Kanehisa et al., 2016) and in the SEED Subsystem  
250 through RASTtk (Brettin et al., 2015). Phenotypes were predicted using the PICA framework  
251 (Feldbauer et al., 2015) and PhenDB (<https://phendb.csb.univie.ac.at/>).

252

## 253 **Results**

254 To investigate links between metabolic potential and genes associated with survival strategies  
255 across extreme temperature and geochemical gradients of the Deception Island volcano, we  
256 analyzed the metagenomes of a total of eighteen samples, comprising fumaroles with temperatures  
257 of 98 °C, 80 °C, 50 °C, and 10 °C, and glaciers with temperatures around 0 °C. Shotgun sequencing  
258 of community genomic DNA on 3 lanes of Illumina HiSeq2000 produced a total of 567,410,264  
259 paired-end reads, within which 475,895,996 were filtered by quality (Q>30) for further analyses.  
260 A total of 162,755,88 reads were taxonomically annotated as Bacteria, 3,680,020 as Archaea,

261 2,094,916 as Eukarya and 79,111 as viruses (Supplementary Table 2). The total number of proteins  
262 predicted in reads were 296,818,692 (62.3%). Relative abundances of the detected genes were  
263 used to compare the metabolic potential and genes related to survival strategies under  
264 environmental extremes among fumaroles and glaciers samples.

265  
266 *De novo* assemblies of the quality-filtered reads generated a total of 543,945 contigs. The  
267 prediction of ORFs resulted in 1,396,820 putative genes, 353,731 assigned within Bacteria, 12,034  
268 within Archaea, and 1,557 and 1,534 within Eukarya and viruses, respectively. We used different  
269 databases for assembly annotation through JGI/IMG that resulted in 487 putative 16S rRNA genes,  
270 842,798 genes based on the COG database and 304,173 genes based on KEGG (Supplementary  
271 Table 2).

272

### 273 **Taxonomic profile of microbial communities on the Deception Island volcano**

274 Through the annotation of reads, we observed that the taxonomic composition in the 98 °C  
275 fumarole was distinct in comparison with other fumaroles and glaciers. Archaea were dominant in  
276 samples from the 98 °C fumarole (relative abundance between 31.5 and 87.3%), with the most  
277 abundant archaeal phyla classified as Crenarchaeota (23.8-79.3%), followed by Euryarchaeota  
278 (2.5-7.5%) and Korarchaeota (0.1-0.4%). Firmicutes (3.1-22.4%), Bacteroidetes (0.6-15.3%),  
279 Aquificae (0.3-4.6%), and Thermotogae (0.3-1.0%) were also detected in minor proportions in the  
280 98 °C fumarole. Looking at the class level, Thermoprotei, Thermococci, Methanococci,  
281 Archaeoglobi, Methanobacteria, Methanopyri, and Methanomicrobia represented the most  
282 abundant archaeal classes (>0.1%) in the 98 °C site, and Bacilli, Gammaproteobacteria,

283 Betaproteobacteria, Fusobacteria, Flavobacteria, Aquificae (order Aquificales) and Thermotogae  
284 (order Thermotogales) were the dominant classes within Bacteria (Figure 2a).

285  
286 Archaea were less dominant in the other samples, with a relative abundance of 0.7-2% in fumaroles  
287 <80 °C and 0.4-0.6% in glaciers. Although some dominant phyla were common between <80 °C  
288 fumaroles and glaciers (e.g. Bacteroidetes, Proteobacteria, and Firmicutes), less dominant phyla  
289 were uniquely distributed according to temperature. For example, Thaumarchaeota was  
290 predominantly found in <80 °C fumaroles (0.8-1% for Whalers Bay and 0.2-0.3% in Fumarole  
291 Bay). Verrucomicrobia and Acidobacteria were only detected in glaciers (1.2-3.1% and 1-1.6%,  
292 respectively) (Figure 2a). The main classes affiliated within the Bacteroidetes phylum were  
293 Cytophagia, Flavobacteria and Sphingobacteria, whereas Gamma- and Alphaproteobacteria were  
294 the most represented classes within Proteobacteria, followed by Beta-, Delta- and Epsilonbacteria  
295 (Figure 2b). Solibacteres was the abundant class within Acidobacteria, and Verrucumicrobiaea  
296 within Verrucomicrobia. Thaumarchaeota assignments were not classified at the class level using  
297 reads annotation in MG-RAST. The taxonomic annotation of contigs through the IMG/M system  
298 showed similar patterns when compared to reads annotation (Supplementary Figure 1).

299  
300 We then used co-occurrence network analysis to explore the complexity of interactions within the  
301 microbial communities in each treatment (Figure 2c). For this, we calculated SparCC correlations  
302 between microbial taxa at the genus level based on metagenome reads annotated in MG-RAST. In  
303 general, the complexity of the community increased with the temperature. We also noted that  
304 communities of Fumarole Bay were more complex than Whalers Bay. The FBA (98 °C) site  
305 showed the highest level of complexity and a modular structure, whereas the WBC (0 °C) site had

306 the least complex network. Interestingly, the proportion of positive/negative correlations also  
307 changed according to the temperature; at higher temperatures, the proportion is even, while in  
308 lower temperatures there was an increase in the number of positive correlations.

309

### 310 **Comparative functional profile of microbial communities on Deception Island volcano**

311 Functional profiles of metagenomes were compared using a multivariate method and hypothesis  
312 test, and significant variations in all functional levels were observed between the 98 °C fumarole,  
313 <80 °C fumaroles and glaciers. Clear differences between these three distinct sample groups were  
314 observed through both the SEED Level 1 profile (Figure 3a) and SEED functional level through  
315 PCA ordination (Figure 3b). Further, a distinct pattern between samples from the highest  
316 temperature was observed. The prevalent core of functions among Deception samples were  
317 “clustering-based subsystems”, “carbohydrates”, “amino acids and derivatives”, “protein  
318 metabolism”, “RNA metabolism”, “DNA metabolism” and “cofactors, vitamins, prosthetic groups  
319 and pigments”. Significant differences between sample groups and functions from level 1 of  
320 SEED, calculated using Fisher's exact two-sided test and the Newcombe-Wilson method, showed  
321 the highest abundance of genes belonging to the categories “DNA metabolism” ( $p = 0.046$ ),  
322 “protein metabolism” ( $p = 0.049$ ), and “phages, prophages, transposable elements and plasmids”  
323 ( $p = 3.97e-3$ ) in the 98 °C fumarole in comparison with other fumaroles and glaciers. The  
324 categories “nitrogen metabolism” ( $p = 1.07e-4$ ), “photosynthesis” ( $p = 5.07e-3$ ), “sulfur  
325 metabolism” ( $p = 0.015$ ), and “metabolism of aromatic compounds” ( $p = 0.036$ ) exhibited the  
326 highest significant values in <80 °C fumaroles when compared to the 98 °C fumarole, and “motility  
327 and chemotaxis” ( $p = 2.71e-8$ ), “RNA metabolism” ( $p = 0.01$ ), and “protein metabolism” ( $p =$   
328  $0.023$ ) when compared to glaciers. In contrast, observations for glaciers showed more genes

329 associated with “carbohydrates” and “virulence, disease and defense” categories in comparison  
330 with the 98 °C fumarole ( $p = 0.049$  and  $p = 0.036$ , respectively) and <80 °C fumaroles ( $p = 1.68e$ -  
331 6 and  $p = 0.012$ , respectively) (Figure 3c).

332

### 333 **Patterns of metabolic partitioning among extreme temperatures**

334 We observed different partitioning patterns of metabolic diversity according to environmental  
335 temperatures (Figure 4). The fumarole with the highest temperature (98 °C) exhibited metabolic  
336 potential significantly higher for functions associated with sulfate reduction ( $p < 0.001$ ),  
337 dissimilatory nitrite reduction ( $p < 0.001$ ) and carbon dioxide fixation ( $p < 0.001$ ) when compared  
338 to other fumaroles and glaciers. Although sulfur metabolism was abundant among all  
339 temperatures, different metabolic pathways related to sulfur were observed according to the  
340 temperature. While sulfate reduction was prevalent in the highest temperature fumarole, a high  
341 number of genes related to inorganic sulfur assimilation ( $p < 0.001$ ) and sulfur oxidation ( $p$  value  
342 was not significant,  $p < 0.1$ ) were detected in <80 °C fumaroles. In general, nitrogen metabolism  
343 was dominant in <80 °C fumaroles when compared to other samples, with nitrate and nitrite  
344 ammonification ( $p < 0.02$ ), denitrification ( $p < 0.01$ ), nitrogen fixation ( $p < 0.05$ ) and ammonia  
345 assimilation ( $p < 0.001$ ) as the prevalent metabolic nitrogen pathways. All fumaroles showed a  
346 similar abundance of genes belonging to sulfur oxidation, nitrate and nitrite ammonification, and  
347 dissimilatory nitrite reduction. The genetic potential for carbon fixation was much higher in the 98  
348 °C fumarole ( $p < 0.01$ ), whereas photosynthesis was mainly detected in the <80 °C fumaroles and  
349 glaciers. In glaciers, the genes identified within carbon metabolism were mainly associated with  
350 heterotrophy and central carbon pathways, such as the pentose phosphate pathway and glycolysis,  
351 as were respiration and fermentation. The function of carbon storage regulators was significantly

352 higher in <80 °C fumaroles, in addition to the observation of other carbon-related processes, such  
353 as photosynthesis, fermentation, and carbon fixation (Figure 4).

354

### 355 **Community survival strategies under environmental extremes**

356 To understand community survival strategies under extreme temperature and geochemical  
357 gradients, we selected genes in our metagenomes that are involved with stress response, DNA  
358 repair, protein biosynthesis, and transport and chemotaxis. Although communities from all  
359 samples were equally abundant in genes related to stress response, very distinct patterns of specific  
360 responses were observed accordingly environmental temperature (Figure 4). The oxidative stress  
361 response was markedly higher in the fumarole at 98 °C, mainly represented by glutaredoxins,  
362 glutathione (redox cycle) and rubrerythrin functions (all with  $p < 0.001$  in comparison with other  
363 samples). Contrastingly, osmotic stress genes were prevalent in glaciers samples, represented  
364 mainly by functions such as osmoregulation ( $p < 0.001$ ), osmoprotectant (*yehX*) ( $p = 0.01$ ),  
365 aquaporin Z ( $p = 0.05$ ) and synthesis of osmoregulated periplasmatic glucans ( $p < 0.001$ ). The  
366 abundance of genes related to heat and cold responses (thermal response) was distinctly distributed  
367 among fumaroles and glaciers. General function of heat-shock proteins (including *hsp70/dnaK*)  
368 were prevalent in glaciers and <80 °C fumaroles ( $p < 0.001$ ), whereas specific archaeal thermal  
369 responses dominated the 98 °C fumarole, such as thermosome chaperonin ( $p < 0.001$ , 0.7% of total  
370 relative abundance), as were bacterial and archaeal heat-shocks *groEL/groES* ( $p < 0.001$ ). The  
371 relative abundance of cold shock *cspA* was higher in <80 °C fumaroles, followed by glaciers ( $p <$   
372  $0.001$ ). Glaciers and <80 °C fumaroles exhibited the highest abundance of dormancy and  
373 sporulation function ( $p < 0.01$ ) and all fumaroles had a prevalence of the universal stress protein  
374 family ( $p < 0.01$ ) (Figure 4).



375

376 Differences in abundance patterns of DNA repair, protein biosynthesis, transport and chemotaxis  
377 were also observed across environmental temperatures (Supplementary Figure 2). Base excision  
378 repair, recombination through *recU* and reverse gyrase (all with  $p < 0.01$ ) were the main strategies  
379 of DNA positive supercoiling and repair notably found in communities of the highest temperature  
380 fumarole (98 °C). Strategies of DNA repair using *uvrABC* complex, recombination through *recA*  
381 and photolyase were dominant in <80 °C fumaroles and glaciers (all with  $p < 0.001$ ). Protein  
382 biosynthesis genes were dominant in the highest temperature fumarole (98 °C); functions such as  
383 universal GTPases ( $p < 0.01$ ) and translation elongation factors in Archaea ( $p < 0.001$ ) were  
384 significantly higher when compared to the other samples. Chemotaxis genes were also prevalent  
385 in the highest temperature fumarole (98 °C) ( $p < 0.001$ ), as were several transport systems  
386 (transport of Ni, Co, and Zn) and ABC transporters (e.g. branched-chain amino acid, oligopeptide  
387 and tungstate) (all with at least  $p < 0.05$ ). Mn transport and the ABC transporters of iron and  
388 peptides were significantly higher in <80 °C fumaroles (all with at least  $p < 0.05$ ) (Supplementary  
389 Figure 2).

390

### 391 **Physical-chemical influence on taxonomic and functional diversity**

392 To identify key environmental drivers of community taxonomy (at phylum level) and function  
393 (SEED level 1), Spearman correlations were calculated; then only significant ( $p < 0.05$ ) and strong  
394 correlations ( $r > -0.6$  or  $0.6$ ) were considered. In general, the phyla that positively correlated with  
395 temperature were Euryarchaeota, Crenarchaeota, Korarchaeota, Nanoarchaeota, Thermotogae, and  
396 Aquificae, whereas several phyla were negatively correlated with temperature (e.g. Acidobacteria,  
397 Bacteroidetes, Spirochaetes, Actinobacteria, Verrucumicrobia, Nitrospirae, Deinococcus-

398 Thermus, and Gemmatimonadetes, among others) (Figure 5a). The phyla that negatively correlated  
399 with ammonia were Proteobacteria, Thaumarchaeota, Euryarchaeota, and Deferribacteres; those  
400 positively correlated were Firmicutes, Acidobacteria, Cyanobacteria, and Spirochaetes, among  
401 others. All significant nitrate correlations were positive, including phyla such as Firmicutes,  
402 Nitrospirae, Thermotogae, etc. Sulfate showed significant positive correlations with  
403 Proteobacteria, Thaumarchaeota, Euryarchaeota, Deferribacteres and Crenarchaeota, and negative  
404 correlations with phyla such as Acidobacteria, Cyanobacteria, Actinobacteria, and  
405 Verrucomicrobia, among others. Other parameters exhibited positive and negative correlations  
406 with several phyla, such as organic matter, organic carbon, B, Cu (uniquely negative correlations),  
407 Fe (uniquely negative correlations), Na, K, Ca, Mg and Al (Figure 5a, Supplementary Table 3).

408  
409 The functional categories (SEED level 1) which presented positive correlations with temperature  
410 were “DNA metabolism”, “nucleosides and nucleotides” and “RNA metabolism”, and those which  
411 exhibited negative correlations were “fatty acids, lipids and isoprenoids”, “iron acquisition”,  
412 “metabolism of aromatic compounds”, “phosphorus metabolism”, “photosynthesis”, “secondary  
413 metabolism”, “stress response”, and “sulfur metabolism” (Figure 5b). Ammonia was negatively  
414 correlated with functions such as “carbohydrates”, “motility and chemotaxis”, “respiration” and  
415 “RNA metabolism”, whereas positive correlations comprised functions as “amino acids and  
416 derivatives” and “cofactors, vitamins, prosthetic groups and pigments”. Nitrate also presented  
417 negative correlations with “carbohydrates”, “dormancy and sporulation” and “phages, prophages,  
418 transposable elements and plasmids”. In contrast, sulfate was positively correlated with  
419 “carbohydrates”, “DNA metabolism”, “motility and chemotaxis”, “respiration” and “RNA  
420 metabolism”. Other parameters exhibited positive and negative correlations with several functions,

421 such as organic matter, organic carbon, B, Cu, Fe, Si, Na, K, Ca, Mg and Al (Figure 5b,  
422 Supplementary Table 3).

423

#### 424 **Metabolic potential and survival strategies in MAGs**

425 In general, the anvi'o pipeline using co-assembly showed the best binning results for our eighteen  
426 metagenomes, generating a total of 158 MAGs. We included in our analyses only 1 MAG produced  
427 through the idba-ud assembler and MaxBin binning since this MAG belonged to a taxon  
428 (*Calditrichia*) which was not achieved through the anvi'o pipeline (Supplementary Figure 3,  
429 Supplementary Table 4). From the 159 MAGs, 12 were assigned as Archaea through GTDB-Tk  
430 and GhostKoala, belonging to Nitrososphaerales (*Candidatus Nitrosocaldus* according with  
431 GhostKoala taxonomy) (2), *Nitrosoarchaeum* (1), *Nitrosotenus* (1), *Nitrospumilus* (1),  
432 Desulfurococcales (*Aeropyrum* according with GhostKoala taxonomy) (1), Acidilobaceae (1),  
433 Pyrodictiaceae (2) and Woesearchaeia (Nanoarchaeota) (3). The bacterial MAGs were classified  
434 through GTDB-Tk and GhostKoala as the following phyla: Acidobacteriota (1), Aquificota (2),  
435 Bacteroidota (92), Calditrichota (5), Campylobacterota (1), Chloroflexota (3), Cyanobacteriota  
436 (1), Firmicutes (1), Nitrospirota (2), Patescibacteria (4) and Proteobacteria (35) (Supplementary  
437 Figure 4, Supplementary Table 4). A total of 13 MAGs were considered as high quality and 82 as  
438 medium quality drafts.

439

440 The MAGs were selected for functional annotation by their quality and based on groups related to  
441 extremophiles and associated to sulfur and nitrogen metabolisms. These 11 selected MAGs were  
442 assigned as DI\_MAG\_00003 (*Sulfurimonas*), DI\_MAG\_00004  
443 (*Hydrogenothermaceae/Persephonella*), DI\_MAG\_00006 (*Promineofilaceae/Candidatus*

444 *Promineofilum*), DI\_MAG\_00010 (Caldilineaceae/*Caldilinea*), DI\_MAG\_00011  
445 (Thermonemataceae), DI\_MAG\_00019 (Chitinophagaceae), DI\_MAG\_00020  
446 (Pyrodictiaceae/*Pyrodictium*), DI\_MAG\_00021 (Dojkabacteria), DI\_MAG\_00022  
447 (Woesearchaeia/archaeon GW2011\_AR20), DI\_MAG\_00049 (Nitrososphaerales/*Candidatus*  
448 *Nitrosocaldus*) and DI\_MAG\_FBB2\_12 (Calditrichia) (Table 1).

449

450 We identified in the high-quality DI\_MAG\_00004 (Hydrogenothermaceae/*Persephonella*, ~ 97%  
451 completeness) genes for nitrate reduction (*narGHI* and *nirA*), denitrification (*narGHI*),  
452 nitrification (*narGH*), sulfate reduction (*sat*, *cysH*, *sir*), sulfur and thiosulfate oxidation  
453 (*soxAXBYZ*), and incomplete pathways for carbon fixation (Figure 6a). This MAG had several  
454 genes associated with stress response, especially oxidative stress (e.g. superoxide reductase and  
455 dismutase, rubrerythrin and rubredoxin) and thermal response (e.g. *groES*, *hsp20* and *hspR*), as  
456 different DNA repair mechanisms, including photolyase repair (Figure 6b). In general, genes  
457 involved with the nitrogen cycle were identified in almost all selected MAGs, except for MAGs  
458 DI\_MAG\_00020, DI\_MAG\_00021, and DI\_MAG\_00022. Sulfate reduction genes were also  
459 detected in different selected MAGs, except for MAGs DI\_MAG\_00020, DI\_MAG\_00021,  
460 DI\_MAG\_00022 and DI\_MAG\_FBB2\_12. All MAGs had incomplete pathways for carbon  
461 fixation, except for DI\_MAG\_00004 and DI\_MAG\_00021 (Figure 6a).

462

463 Different cold-shock genes were detected among MAGs; DI\_MAG\_00006 was the one which  
464 presented more *csp* genes. We did not find any *csp* genes in archaeal MAGs (DI\_MAG\_00020,  
465 DI\_MAG\_00022, and DI\_MAG\_00049). However, we observed genes in all selected MAGs that  
466 were related to different heat-shock responses, including *groEL/groES* genes in DI\_MAG\_00004,

467 DI\_MAG\_00020, and DI\_MAG\_00021. Thermosome (*thsA*) and reverse gyrase genes were  
468 identified in all the selected MAGs assigned as Archaea (DI\_MAG\_00020, DI\_MAG\_00022, and  
469 DI\_MAG\_00049). Although all MAGs showed the potential presence of oxidative stress response  
470 (except DI\_MAG\_00049), rubrerythrin and rubredoxin genes were only observed in  
471 DI\_MAG\_00004 and DI\_MAG\_00003. Different DNA repair mechanisms were identified in  
472 selected MAGs, such as several recombination genes (*rec* genes), DNA mismatch repair (*mut*  
473 genes), nucleotide excision repair (*uvr* genes), double-strand break repair (*herA*, only in archaeal-  
474 selected MAGs) and photolyase repair (only in DI\_MAG\_00004) (Figure 6b).

475

## 476 **Discussion**

477 The primary goal of our study was to unveil how communities functionally respond to the  
478 combination of environmental factors typical of polar marine volcanoes. Our results show that  
479 regardless of proximity between fumaroles and glaciers on Deception Island, the community  
480 function is strongly driven by the combination of contrasting environmental factors, as occurred  
481 similar to what we previously observed for community composition and diversity (Bendia et al.,  
482 2018b). We detected some bacterial groups present in both glacier and fumarole sediments (most  
483 notably the phyla Proteobacteria, Firmicutes, and Bacteroidetes), despite the strong gradients in  
484 temperature, geochemistry and salinity. In addition, we observed specific groups that varied  
485 according to the environmental temperature: the hyperthermophilic members belonging to  
486 Crenarchaeota/Thermoprotei, Aquificae and Thermotoga phyla in the 98 °C fumarole,  
487 Thaumarchaeota in <80 °C fumaroles, and Acidobacteria and Verrucomicrobia in glaciers. These  
488 patterns are consistent with previous work carried out on Deception Island using the same sample  
489 set for diversity analysis (16S rRNA gene sequencing) (Bendia et al., 2018b), except for the

490 Aquificae and Thermotogae phyla, which were not detected by that method. Furthermore, our  
491 taxonomic patterns were also consistent with a previous report that observed similar members  
492 along a temperature gradient ranging from 7.5 to 99 °C in geothermal areas in Canada and New  
493 Zealand (Sharp et al., 2014).

494

495 Surprisingly, our network analysis showed that the community interaction in the hottest fumarole  
496 (98 °C) was more complex and presented fewer positive interactions when compared to the lowest  
497 temperatures, in contrast to previous studies that showed that community complexity decreases  
498 with temperature increase (Cole et al., 2013; Merino et al., 2019; Sharp et al., 2014). Our results  
499 suggest that hyperthermophilic temperatures on Deception probably trigger ecological interactions  
500 between community members to modulate their resistance and resilience when facing strong  
501 environmental stressors. Similar patterns of community interaction have been previously observed  
502 in stressful conditions in the Atacama Desert (Mandakovic et al., 2018) and with increasing  
503 temperature in anaerobic digestion (Lin et al., 2016), although these environmental conditions are  
504 different from those found on Deception Island.

505

506 Correlation with environmental drivers varied among both taxonomic and functional groups. For  
507 example, groups positively influenced by temperature, sulfate, and sodium were those mainly  
508 abundant in fumaroles, while groups and functions prevalent in glaciers were positively correlated  
509 with ammonia. These results indicate that the mosaic of environmental parameters shapes both  
510 taxonomic and functional diversity of microbial communities. Indeed, we observed a partition of  
511 metabolic diversity among the steep environmental gradients on Deception Island. Unlike previous  
512 studies carried out at hydrothermal vents which pointed to metabolic functional redundancy at the

513 community level (Galambos et al., 2019; Reveillaud et al., 2016), Deception communities showed  
514 metabolic heterogeneity across the sharp temperature gradient. The observation of functional  
515 redundancy despite the taxonomic variation has been observed in several environments such as  
516 venting fluids from the Mariana back-arc, cold seafloor ecosystems, freshwater and gut  
517 microbiomes (Louca et al., 2016; Trembath-Reichert et al., 2019; Tully et al., 2018; Turnbaugh  
518 and Gordon, 2009; Várbró et al., 2017). The metabolic heterogeneity observed in our results  
519 indicates that microbial communities on Deception harbor a remarkably diverse genetic content  
520 that reflects the strong selective pressures caused by a remarkable interaction between the volcanic  
521 activity, the marine environment, and the cryosphere.

522

523 The functional pattern clustered the samples by temperature, rather than by geographic location,  
524 and showed that microbial communities on Deception Island are grouped by 98 °C fumarole, <80  
525 °C fumaroles and glaciers. The predominant metabolic potential in the hottest fumarole (98 °C)  
526 was mostly associated with reductive pathways, such as sulfate reduction, ammonification, and  
527 dissimilatory nitrite reduction, and carbon fixation. We suggest that the hydrogen sulfide emissions  
528 and hyperthermophilic conditions of this fumarole (98 °C) (Somoza et al., 2004) may decrease the  
529 dissolved oxygen even in the superficial sediment layers, creating a steep redox gradient and  
530 preferably selecting microorganisms with reductive and autotrophic pathways. In addition,  
531 communities from the hottest fumarole (98 °C) exhibited several genes related to different adaptive  
532 strategies, such as those associated with oxidative stress, specific archaeal heat-shock responses,  
533 base excision repair, recombination (*recU*), reverse gyrase, protein biosynthesis, chemotaxis, and  
534 ABC transporters. This reflects its primary stress factors, including the fumarolic production of  
535 hydrogen sulfide, which has a strong reductive power capable of causing oxidative stress, and

536 hyperthermophilic temperature that induces disturbance to metabolic processes and cell-  
537 component denaturation (Hedlund et al., 2015; Merino et al., 2019). Enrichment in genes involved  
538 with chemotaxis was also observed in metagenomes from hydrothermal vents at Juan de Fuca  
539 Ridge (Xie et al., 2011), but different DNA repair mechanisms were found when compared to  
540 Deception metagenomes. Different types of ABC transporters were also detected in Ilheya  
541 hydrothermal fields (Wang and Sun, 2017); reverse gyrase and thermosome mechanisms have  
542 often been described in several groups of hyper(thermophilic) Archaea (Forterre et al., 2000;  
543 Lemmens et al., 2018; Lulchev and Klostermeier, 2014).

544

545 In contrast, <80 °C fumaroles were dominated by genes involved with different energetic and  
546 chemolithotrophic pathways: sulfur oxidation, ammonification, denitrification, nitrogen fixation,  
547 and dissimilatory nitrite reduction. This suggests a trend for both reductive and oxidative  
548 pathways, as well as metabolic versatility and complex biogeochemical processes at the local  
549 community level. Although genes related to sulfur and nitrogen pathways were detected in  
550 glaciers, the majority of potential pathways for glacier communities were related to carbon  
551 metabolism and heterotrophy. This lowest metabolic diversity can be explained by the decrease of  
552 marine and volcanic geochemicals (e.g. sulfate) towards glaciers (Supplementary Table 1), making  
553 these substrates unavailable for exploiting different energy sources, as occurs in fumaroles. The  
554 <80 °C fumaroles and glacier communities harbored mechanisms for both heat and cold-shock  
555 genes, dormancy and sporulation functions, and DNA repair mechanisms through *uvrABC*  
556 complex, *recA*, and photolyase. Diverse survival strategies in <80 °C fumaroles and glaciers might  
557 be explained by community exposure to fluctuating temperatures and redox conditions that are  
558 more variable when compared to the stability of hottest fumarole, which maintains the



559 hyperthermophilic temperatures and hydrogen sulfide emissions for long periods. Further, glacier  
560 communities exhibited more genes associated with osmotic stress, which reflects the low liquid  
561 water availability due to the predominant freezing conditions of the Antarctic ecosystems (Wei et  
562 al., 2016).

563

564 Although several studies have shown a quantitative decrease in microbial diversity as temperature  
565 increases in both geothermal and hydrothermal ecosystems (Cole et al., 2013; Sharp et al., 2014),  
566 little is known about how temperature affects ecosystem functioning due to inhibition of key  
567 metabolic enzymes or pathways (Hedlund et al., 2015). Despite the limitation of metagenomics in  
568 revealing the truly active microbial metabolic pathways, our results increase understanding of the  
569 potential temperature limits on different microbial metabolism at the community level and  
570 encourage more studies to elucidate the direct effect of temperature extremes on specific  
571 biogeochemical processes in Antarctic volcanic ecosystems.

572

573 The 159 MAGs recovered from the Deception Island volcano comprised a broad phylogenetic  
574 range of archaeal and bacterial phyla. The 11 MAGs selected for annotation included  
575 hyperthermophilic and thermophilic lineages, as well as lineages containing homologs of different  
576 predicted sulfur and nitrogen pathways, and archaeal groups underrepresented in genome data,  
577 such as *Ca. Nitrosocaldus* and Nanoarchaeota/Woesearchaeia. Since *Ca. Nitrosocaldus* was  
578 previously reported only in terrestrial geothermal environments (Abby et al., 2018; Daebeler et al.,  
579 2018; Torre et al., 2008), their presence on Deception fumaroles represents a novel outcome for  
580 the ecological distribution of thermophilic ammonia-oxidizing Archaea and encourages further  
581 investigation to better understand their role in marine volcanic ecosystems. Furthermore, the

582 majority of our selected MAGs are equipped with gene-encoding proteins that protect cells against  
583 several stressful conditions, including cold and heat-shock, carbon starvation, oxidative and  
584 periplasmic stress, and DNA damage, likely enabling survival and adaptation of these  
585 microorganisms to a broad combination of extreme parameters. One of our MAGs was closely  
586 related to archaeon GW2011\_AR20, which is an uncultivated and underrepresented  
587 Nanoarchaeota/Woearchaeia member described previously in aquifer samples and appears to  
588 have a symbiotic or pathogenic lifestyle due to the small genome size and lack of some  
589 biosynthesis pathways (Castelle et al., 2015). The genome analysis of our Woearchaeia MAG  
590 (archaeon GW2011\_AR20, DI\_MAG\_00022) suggests a novel putative thermophilic lifestyle or  
591 at least a potential heat tolerance for this lineage due to the (i) lack of cold-shock genes, (these  
592 genes are mostly absent in the genomes of thermophilic archaea, while usually present in  
593 psychrophilic/mesophilic archaeal members (Cavicchioli, 2006; Giaquinto et al., 2007), and (ii)  
594 the presence of reverse gyrase, thermosome and other heat-shock genes (e.g. *groES*) that are  
595 essentially related to (hyper)thermophiles and heat response. Although these heat-shock genes  
596 were also detected in some mesophilic archaeal lineages within Halobacteria, Thaumarchaeota,  
597 and *Methanosarcina* spp. (Lemmens et al., 2018), reverse gyrase is the only protein found  
598 ubiquitously in hyperthermophilic organisms, but absent in mesophiles (Catchpole and Forterre,  
599 2019), pointing to this Woearchaeia member as a likely thermophile or hyperthermophile.

600

## 601 **Conclusion**

602 By combining the annotation of reads and contigs together with genome reconstruction from  
603 metagenomic data, we provide the first genetic and genomic evidence that microorganisms  
604 inhabiting the Deception Island volcano possess a variety of adaptive strategies and metabolic

605 processes that are shaped by steep environmental gradients. We observed that hyperthermophilic  
606 temperatures (98 °C) preferably select microorganisms with reductive and autotrophic pathways,  
607 while communities from fumaroles <80 °C show a high metabolic versatility with both reductive  
608 and oxidative pathways, and glaciers harbor communities with metabolic processes especially  
609 related to carbon metabolism and heterotrophy. Survival strategies of microorganisms from the  
610 hottest fumarole are very specialized in responding to the hyperthermophilic temperatures and  
611 oxidative stress, while <80 °C fumaroles and glacier communities possess a variety of strategies  
612 that are capable of responding to fluctuating redox and temperature conditions. We found more  
613 complex and negative interactions among the communities from the hottest fumarole (98 °C),  
614 which indicate that the strong environmental stressors probably trigger competitive associations  
615 among community members. Furthermore, through the reconstruction of MAGs, we were able to  
616 clarify a putative novel thermophilic lifestyle for a Woesearchaeia member and a marine lifestyle  
617 for a *Ca. Nitrosocaldus* lineage. Our work represents, as far as we know, the first study to reveal  
618 through shotgun metagenomics the response of microbial functional diversity to the extreme  
619 temperature gradient (0 to 98°C) of an Antarctic volcano. Furthermore, our study was one of the  
620 first to recover MAGs from these ecosystems and it provides new insights regarding the metabolic  
621 and survival capabilities of different extremophiles inhabiting the Antarctic volcanoes.

622

623

624

625

626

627

628 **Author Contributions**

629 AB collected the samples, conceived and designed the experiments, performed the experiments,  
630 analyzed the data, performed bioinformatic analysis, wrote the paper, and prepared figures and  
631 tables. LL contributed to discussion of metagenome-assembled genome analysis, discussed the  
632 data, wrote the paper, and reviewed drafts of the paper. LM performed network analysis, wrote the  
633 paper, and reviewed drafts of the paper. CS discussed the data, wrote the paper, and reviewed  
634 drafts of the paper. BB discussed the data, wrote and reviewed drafts of the paper. VP conceived  
635 and designed the experiments, contributed reagents, materials, and analysis tools, and wrote and  
636 reviewed drafts of the paper.

637

638 **Funding**

639 This study was part of the projects Microsfera (CNPq 407816/2013-5) and INCT-Criosfera (CNPq  
640 028306/2009) and supported by the Brazilian National Council of Technological and Scientific  
641 Development (CNPq) and the Brazilian Antarctic Program (ProAntar). The São Paulo Research  
642 Foundation – FAPESP supported ABs Doctoral fellowship (2012/23241-0).

643

644 **Conflict of Interest Statement**

645 The authors declare that the research was conducted in the absence of any commercial or financial  
646 relationships that could be construed as a potential conflict of interest.

647

648

649

650

651 **Acknowledgments**

652 We thank the captain and the crew of the research polar vessel Almirante Maximiano, Dr. Luiz  
653 Henrique Rosa, Dr. Wânia Duleba, and Dr. Antônio Carlos Rocha Campos for their support in  
654 sampling. We are very thankful to LECOM's research team and Rosa C. Gamba for their scientific  
655 support.

656

657

## 658 **References**

- 659  
660
- 661 Abby, S.S., Melcher, M., Kerou, M., Krupovic, M., Stieglmeier, M., Rossel, C., Pfeifer, K.,  
662 Schleper, C., 2018. Candidatus Nitrosocaldus cavascurensis, an Ammonia Oxidizing,  
663 Extremely Thermophilic Archaeon with a Highly Mobile Genome. *Front. Microbiol.* 9.  
664 <https://doi.org/10.3389/fmicb.2018.00028>
- 665 Alneberg, J., Bjarnason, B.S., de Bruijn, I., Schirmer, M., Quick, J., Ijaz, U.Z., Loman, N.J.,  
666 Andersson, A.F., Quince, C., 2013. CONCOCT: Clustering cONTigs on Coverage and  
667 ComposiTiOn. *ArXiv13124038 Q-Bio*.
- 668 Altschul, S.F., Gish, W., Miller, W., Myers, E.W., Lipman, D.J., 1990. Basic local alignment  
669 search tool. *J. Mol. Biol.* 215, 403–410. [https://doi.org/10.1016/S0022-2836\(05\)80360-2](https://doi.org/10.1016/S0022-2836(05)80360-2)
- 670 Amenábar, M.J., Flores, P.A., Pugin, B., Boehmwald, F.A., Blamey, J.M., 2013. Archaeal  
671 diversity from hydrothermal systems of Deception Island, Antarctica. *Polar Biol.* 36, 373–  
672 380. <https://doi.org/10.1007/s00300-012-1267-3>
- 673 Antranikian, G., Suleiman, M., Schäfers, C., Adams, M.W.W., Bartolucci, S., Blamey, J.M.,  
674 Birkeland, N.-K., Bonch-Osmolovskaya, E., da Costa, M.S., Cowan, D., Danson, M.,  
675 Forterre, P., Kelly, R., Ishino, Y., Littlechild, J., Moracci, M., Noll, K., Oshima, T., Robb,  
676 F., Rossi, M., Santos, H., Schönheit, P., Sterner, R., Thauer, R., Thomm, M., Wiegel, J.,  
677 Stetter, K.O., 2017. Diversity of bacteria and archaea from two shallow marine  
678 hydrothermal vents from Vulcano Island. *Extremophiles* 21, 733–742.  
679 <https://doi.org/10.1007/s00792-017-0938-y>
- 680 Aziz, R.K., Bartels, D., Best, A.A., DeJongh, M., Disz, T., Edwards, R.A., Formsma, K., Gerdes,  
681 S., Glass, E.M., Kubal, M., Meyer, F., Olsen, G.J., Olson, R., Osterman, A.L., Overbeek,  
682 R.A., McNeil, L.K., Paarmann, D., Paczian, T., Parrello, B., Pusch, G.D., Reich, C.,  
683 Stevens, R., Vassieva, O., Vonstein, V., Wilke, A., Zagnitko, O., 2008. The RAST Server:  
684 Rapid Annotations using Subsystems Technology. *BMC Genomics* 9, 75.  
685 <https://doi.org/10.1186/1471-2164-9-75>
- 686 Baker, P.E., McReath, I., Harvey, M.R., Roobol, M.J., Davies, T.G., 1975. The geology of the  
687 South Shetland Islands: V. Volcanic evolution of Deception Island. *British Antarctic*  
688 *Survey*, Cambridge.
- 689 Bartolini, S., Geyer, A., Martí, J., Pedrazzi, D., Aguirre-Díaz, G., 2014. Volcanic hazard on  
690 Deception Island (South Shetland Islands, Antarctica). *J. Volcanol. Geotherm. Res.* 285,  
691 150–168. <https://doi.org/10.1016/j.jvolgeores.2014.08.009>
- 692 Bastian, M., Heymann, S., Jacomy, M., 2009. Gephi: An Open Source Software for Exploring and  
693 Manipulating Networks, in: *Third International AAAI Conference on Weblogs and Social*  
694 *Media*. Presented at the Third International AAAI Conference on Weblogs and Social  
695 *Media*.
- 696 Bendia, A.G., Araujo, G.G., Pulschen, A.A., Contro, B., Duarte, R.T.D., Rodrigues, F., Galante,  
697 D., Pellizari, V.H., 2018a. Surviving in hot and cold: psychrophiles and thermophiles from  
698 Deception Island volcano, Antarctica. *Extremophiles* 22, 917–929.  
699 <https://doi.org/10.1007/s00792-018-1048-1>
- 700 Bendia, A.G., Signori, C.N., Franco, D.C., Duarte, R.T.D., Bohannon, B.J.M., Pellizari, V.H.,  
701 2018b. A Mosaic of Geothermal and Marine Features Shapes Microbial Community

- 702 Structure on Deception Island Volcano, Antarctica. *Front. Microbiol.* 9.  
703 <https://doi.org/10.3389/fmicb.2018.00899>
- 704 Bowers, R.M., Kyrpidis, N.C., Stepanauskas, R., Harmon-Smith, M., Doud, D., Reddy, T.B.K.,  
705 Schulz, F., Jarett, J., Rivers, A.R., Eloie-Fadrosch, E.A., Tringe, S.G., Ivanova, N.N.,  
706 Copeland, A., Clum, A., Becraft, E.D., Malmstrom, R.R., Birren, B., Podar, M., Bork, P.,  
707 Weinstock, G.M., Garrity, G.M., Dodsworth, J.A., Yooseph, S., Sutton, G., Glöckner, F.O.,  
708 Gilbert, J.A., Nelson, W.C., Hallam, S.J., Jungbluth, S.P., Ettema, T.J.G., Tighe, S.,  
709 Konstantinidis, K.T., Liu, W.-T., Baker, B.J., Rattei, T., Eisen, J.A., Hedlund, B.,  
710 McMahon, K.D., Fierer, N., Knight, R., Finn, R., Cochrane, G., Karsch-Mizrachi, I.,  
711 Tyson, G.W., Rinke, C., Lapidus, A., Meyer, F., Yilmaz, P., Parks, D.H., Eren, A.M.,  
712 Schriml, L., Banfield, J.F., Hugenholtz, P., Woyke, T., 2017. Minimum information about  
713 a single amplified genome (MISAG) and a metagenome-assembled genome (MIMAG) of  
714 bacteria and archaea. *Nat. Biotechnol.* 35, 725–731. <https://doi.org/10.1038/nbt.3893>
- 715 Brettin, T., Davis, J.J., Disz, T., Edwards, R.A., Gerdes, S., Olsen, G.J., Olson, R., Overbeek, R.,  
716 Parrello, B., Pusch, G.D., Shukla, M., Thomason, J.A., Stevens, R., Vonstein, V., Wattam,  
717 A.R., Xia, F., 2015. RASTtk: A modular and extensible implementation of the RAST  
718 algorithm for building custom annotation pipelines and annotating batches of genomes.  
719 *Sci. Rep.* 5, 8365. <https://doi.org/10.1038/srep08365>
- 720 Carrión, O., Miñana-Galbis, D., Montes, M.J., Mercadé, E., 2011. *Pseudomonas deceptionensis*  
721 sp. nov., a psychrotolerant bacterium from the Antarctic. *Int. J. Syst. Evol. Microbiol.* 61,  
722 2401–2405. <https://doi.org/10.1099/ijs.0.024919-0>
- 723 Castelle, C.J., Wrighton, K.C., Thomas, B.C., Hug, L.A., Brown, C.T., Wilkins, M.J., Frischkorn,  
724 K.R., Tringe, S.G., Singh, A., Markillie, L.M., Taylor, R.C., Williams, K.H., Banfield, J.F.,  
725 2015. Genomic Expansion of Domain Archaea Highlights Roles for Organisms from New  
726 Phyla in Anaerobic Carbon Cycling. *Curr. Biol.* 25, 690–701.  
727 <https://doi.org/10.1016/j.cub.2015.01.014>
- 728 Catchpole, R.J., Forterre, P., 2019. The Evolution of Reverse Gyrase Suggests a  
729 Nonhyperthermophilic Last Universal Common Ancestor. *Mol. Biol. Evol.* 36, 2737–  
730 2747. <https://doi.org/10.1093/molbev/msz180>
- 731 Cavicchioli, R., 2006. Cold-adapted archaea. *Nat. Rev. Microbiol.* 4, 331–343.  
732 <https://doi.org/10.1038/nrmicro1390>
- 733 Centurion, V.B., Delforno, T.P., Lacerda-Júnior, G.V., Duarte, A.W.F., Silva, L.J., Bellini, G.B.,  
734 Rosa, L.H., Oliveira, V.M., 2019. Unveiling resistome profiles in the sediments of an  
735 Antarctic volcanic island. *Environ. Pollut.* 255, 113240.  
736 <https://doi.org/10.1016/j.envpol.2019.113240>
- 737 Chaumeil, P.-A., Mussig, A.J., Hugenholtz, P., Parks, D.H., 2020. GTDB-Tk: a toolkit to classify  
738 genomes with the Genome Taxonomy Database. *Bioinformatics* 36, 1925–1927.  
739 <https://doi.org/10.1093/bioinformatics/btz848>
- 740 Cole, J.K., Peacock, J.P., Dodsworth, J.A., Williams, A.J., Thompson, D.B., Dong, H., Wu, G.,  
741 Hedlund, B.P., 2013. Sediment microbial communities in Great Boiling Spring are  
742 controlled by temperature and distinct from water communities. *ISME J.* 7, 718–729.  
743 <https://doi.org/10.1038/ismej.2012.157>
- 744 Daebeler, A., Herbold, C.W., Vierheilig, J., Sedlacek, C.J., Pjevac, P., Albertsen, M., Kirkegaard,  
745 R.H., de la Torre, J.R., Daims, H., Wagner, M., 2018. Cultivation and Genomic Analysis  
746 of “*Candidatus Nitrosocaldus islandicus*,” an Obligately Thermophilic, Ammonia-

- 747 Oxidizing Thaumarchaeon from a Hot Spring Biofilm in Graendalur Valley, Iceland. *Front.*  
748 *Microbiol.* 9. <https://doi.org/10.3389/fmicb.2018.00193>
- 749 Dick, G.J., 2019. The microbiomes of deep-sea hydrothermal vents: distributed globally, shaped  
750 locally. *Nat. Rev. Microbiol.* 17, 271–283. <https://doi.org/10.1038/s41579-019-0160-2>
- 751 Eren, A.M., Esen, Ö.C., Quince, C., Vineis, J.H., Morrison, H.G., Sogin, M.L., Delmont, T.O.,  
752 2015. Anvi'o: an advanced analysis and visualization platform for 'omics data. *PeerJ* 3,  
753 e1319. <https://doi.org/10.7717/peerj.1319>
- 754 Feldbauer, R., Schulz, F., Horn, M., Rattei, T., 2015. Prediction of microbial phenotypes based on  
755 comparative genomics. *BMC Bioinformatics* 16, S1. [https://doi.org/10.1186/1471-2105-](https://doi.org/10.1186/1471-2105-16-S14-S1)  
756 [16-S14-S1](https://doi.org/10.1186/1471-2105-16-S14-S1)
- 757 Fermani, P., Mataloni, G., Van de Vijver, B., 2007. Soil microalgal communities on an antarctic  
758 active volcano (Deception Island, South Shetlands). *Polar Biol.* 30, 1381–1393.  
759 <https://doi.org/10.1007/s00300-007-0299-6>
- 760 Finn, R.D., Clements, J., Eddy, S.R., 2011. HMMER web server: interactive sequence similarity  
761 searching. *Nucleic Acids Res.* 39, W29–W37. <https://doi.org/10.1093/nar/gkr367>
- 762 Forterre, P., Tour, C.B. de la, Philippe, H., Duguet, M., 2000. Reverse gyrase from  
763 hyperthermophiles: probable transfer of a thermoadaptation trait from Archaea to Bacteria.  
764 *Trends Genet.* 16, 152–154. [https://doi.org/10.1016/S0168-9525\(00\)01980-6](https://doi.org/10.1016/S0168-9525(00)01980-6)
- 765 Freilich, S., Kreimer, A., Meilijson, I., Gophna, U., Sharan, R., Ruppín, E., 2010. The large-scale  
766 organization of the bacterial network of ecological co-occurrence interactions. *Nucleic*  
767 *Acids Res.* 38, 3857–3868. <https://doi.org/10.1093/nar/gkq118>
- 768 Friedman, J., Alm, E.J., 2012. Inferring Correlation Networks from Genomic Survey Data. *PLoS*  
769 *Comput. Biol.* 8. <https://doi.org/10.1371/journal.pcbi.1002687>
- 770 Galambos, D., Anderson, R.E., Reveillaud, J., Huber, J.A., 2019. Genome-resolved metagenomics  
771 and metatranscriptomics reveal niche differentiation in functionally redundant microbial  
772 communities at deep-sea hydrothermal vents. *Environ. Microbiol.* 21, 4395–4410.  
773 <https://doi.org/10.1111/1462-2920.14806>
- 774 Galperin, M.Y., Makarova, K.S., Wolf, Y.I., Koonin, E.V., 2015. Expanded microbial genome  
775 coverage and improved protein family annotation in the COG database. *Nucleic Acids Res.*  
776 43, D261–D269. <https://doi.org/10.1093/nar/gku1223>
- 777 Geyer, A., Álvarez-Valero, A.M., Gisbert, G., Aulinas, M., Hernández-Barreña, D., Lobo, A.,  
778 Martí, J., 2019. Deciphering the evolution of Deception Island's magmatic system. *Sci.*  
779 *Rep.* 9, 373. <https://doi.org/10.1038/s41598-018-36188-4>
- 780 Giaquinto, L., Curmi, P.M.G., Siddiqui, K.S., Poljak, A., DeLong, E., DasSarma, S., Cavicchioli,  
781 R., 2007. Structure and Function of Cold Shock Proteins in Archaea. *J. Bacteriol.* 189,  
782 5738–5748. <https://doi.org/10.1128/JB.00395-07>
- 783 Hedlund, B.P., Thomas, S.C., Dodsworth, J.A., Zhang, C.L., 2015. Life in High-Temperature  
784 Environments, in: *Manual of Environmental Microbiology*. John Wiley & Sons, Ltd, pp.  
785 4.3.4-1-4.3.4-15. <https://doi.org/10.1128/9781555818821.ch4.3.4>
- 786 Herbold, C.W., McDonald, I.R., Cary, S.C., 2014. Microbial Ecology of Geothermal Habitats in  
787 Antarctica, in: Cowan, D.A. (Ed.), *Antarctic Terrestrial Microbiology: Physical and*  
788 *Biological Properties of Antarctic Soils*. Springer, Berlin, Heidelberg, pp. 181–215.  
789 [https://doi.org/10.1007/978-3-642-45213-0\\_10](https://doi.org/10.1007/978-3-642-45213-0_10)
- 790 Hyatt, D., Chen, G.-L., LoCascio, P.F., Land, M.L., Larimer, F.W., Hauser, L.J., 2010. Prodigal:  
791 prokaryotic gene recognition and translation initiation site identification. *BMC*  
792 *Bioinformatics* 11, 119. <https://doi.org/10.1186/1471-2105-11-119>



- 793 Joshi, N., Fass, J., 2011. Sickle: A sliding-window, adaptive, quality-based trimming tool for  
794 FastQ files (Version 1.33) [Software].
- 795 Kanehisa, M., Goto, S., 2000. KEGG: Kyoto Encyclopedia of Genes and Genomes. *Nucleic Acids*  
796 *Res.* 28, 27–30. <https://doi.org/10.1093/nar/28.1.27>
- 797 Kanehisa, M., Sato, Y., Morishima, K., 2016. BlastKOALA and GhostKOALA: KEGG Tools for  
798 Functional Characterization of Genome and Metagenome Sequences. *J. Mol. Biol.,*  
799 *Computation Resources for Molecular Biology* 428, 726–731.  
800 <https://doi.org/10.1016/j.jmb.2015.11.006>
- 801 Keegan, K.P., Glass, E.M., Meyer, F., 2016. MG-RAST, a Metagenomics Service for Analysis of  
802 Microbial Community Structure and Function, in: Martin, F., Uroz, S. (Eds.), *Microbial*  
803 *Environmental Genomics (MEG), Methods in Molecular Biology.* Springer, New York,  
804 NY, pp. 207–233. [https://doi.org/10.1007/978-1-4939-3369-3\\_13](https://doi.org/10.1007/978-1-4939-3369-3_13)
- 805 Langmead, B., Salzberg, S.L., 2012. Fast gapped-read alignment with Bowtie 2. *Nat. Methods* 9,  
806 357–359. <https://doi.org/10.1038/nmeth.1923>
- 807 Lemmens, L., Baes, R., Peeters, E., 2018. Heat shock response in archaea. *Emerg. Top. Life Sci.*  
808 2, 581–593. <https://doi.org/10.1042/ETLS20180024>
- 809 Lezcano, M.Á., Moreno-Paz, M., Carrizo, D., Prieto-Ballesteros, O., Fernández-Martínez, M.Á.,  
810 Sánchez-García, L., Blanco, Y., Puente-Sánchez, F., de Diego-Castilla, G., García-  
811 Villadangos, M., Fairén, A.G., Parro, V., 2019. Biomarker Profiling of Microbial Mats in  
812 the Geothermal Band of Cerro Caliente, Deception Island (Antarctica): Life at the Edge of  
813 Heat and Cold. *Astrobiology* 19, 1490–1504. <https://doi.org/10.1089/ast.2018.2004>
- 814 Li, D., Liu, C.-M., Luo, R., Sadakane, K., Lam, T.-W., 2015. MEGAHIT: an ultra-fast single-node  
815 solution for large and complex metagenomics assembly via succinct de Bruijn graph.  
816 *Bioinformatics* 31, 1674–1676. <https://doi.org/10.1093/bioinformatics/btv033>
- 817 Lin, Q., De Vrieze, J., Li, J., Li, X., 2016. Temperature affects microbial abundance, activity and  
818 interactions in anaerobic digestion. *Bioresour. Technol.* 209, 228–236.  
819 <https://doi.org/10.1016/j.biortech.2016.02.132>
- 820 Llarch, À., Logan, N.A., Castellví, J., Prieto, M.J., Guinea, J., 1997. Isolation and Characterization  
821 of Thermophilic *Bacillus* spp. from Geothermal Environments on Deception Island, South  
822 Shetland Archipelago. *Microb. Ecol.* 34, 58–65. <https://doi.org/10.1007/s002489900034>
- 823 Louca, S., Parfrey, L.W., Doebeli, M., 2016. Decoupling function and taxonomy in the global  
824 ocean microbiome. *Science* 353, 1272–1277. <https://doi.org/10.1126/science.aaf4507>
- 825 Lulchev, P., Klostermeier, D., 2014. Reverse gyrase—recent advances and current mechanistic  
826 understanding of positive DNA supercoiling. *Nucleic Acids Res.* 42, 8200–8213.  
827 <https://doi.org/10.1093/nar/gku589>
- 828 Mandakovic, D., Rojas, C., Maldonado, J., Latorre, M., Travisany, D., Delage, E., Bihouée, A.,  
829 Jean, G., Díaz, F.P., Fernández-Gómez, B., Cabrera, P., Gaete, A., Latorre, C., Gutiérrez,  
830 R.A., Maass, A., Cambiazo, V., Navarrete, S.A., Eveillard, D., González, M., 2018.  
831 Structure and co-occurrence patterns in microbial communities under acute environmental  
832 stress reveal ecological factors fostering resilience. *Sci. Rep.* 8, 5875.  
833 <https://doi.org/10.1038/s41598-018-23931-0>
- 834 Markowitz, V.M., Mavromatis, K., Ivanova, N.N., Chen, I.-M.A., Chu, K., Kyrpides, N.C., 2009.  
835 IMG ER: a system for microbial genome annotation expert review and curation.  
836 *Bioinformatics* 25, 2271–2278. <https://doi.org/10.1093/bioinformatics/btp393>

- 837 Merino, N., Aronson, H.S., Bojanova, D.P., Feyhl-Buska, J., Wong, M.L., Zhang, S., Giovannelli,  
838 D., 2019. Living at the Extremes: Extremophiles and the Limits of Life in a Planetary  
839 Context. *Front. Microbiol.* 10. <https://doi.org/10.3389/fmicb.2019.00780>
- 840 Muñoz, P.A., Flores, P.A., Boehmwald, F.A., Blamey, J.M., 2011. Thermophilic bacteria present  
841 in a sample from Fumarole Bay, Deception Island. *Antarct. Sci.* 23, 549–555.  
842 <https://doi.org/10.1017/S0954102011000393>
- 843 Muñoz-Martín, A., Catalán, M., Martín-Dávila, J., Carbó, A., 2005. Upper crustal structure of  
844 Deception Island area (Bransfield Strait, Antarctica) from gravity and magnetic modelling.  
845 *Antarct. Sci.* 17, 213–224. <https://doi.org/10.1017/S0954102005002622>
- 846 Nakagawa, T., Takai, K., Suzuki, Y., Hirayama, H., Konno, U., Tsunogai, U., Horikoshi, K., 2006.  
847 Geomicrobiological exploration and characterization of a novel deep-sea hydrothermal  
848 system at the TOTO caldera in the Mariana Volcanic Arc. *Environ. Microbiol.* 8, 37–49.  
849 <https://doi.org/10.1111/j.1462-2920.2005.00884.x>
- 850 Newman, M., 2003. The Structure and Function of Complex Networks. *Struct. Funct. Complex*  
851 *Netw.* 45, 167–256. <https://doi.org/10.1137/S003614450342480>
- 852 Oksanen, J., 2007. *vegan: Community Ecology Package*. R package version 1.8-5 [WWW  
853 Document]. URL [/paper/vegan-%3A-Community-Ecology-Package.-R-package-1.8-5-](http://paper/vegan-%3A-Community-Ecology-Package.-R-package-1.8-5-Oksanen/ce62be133614e05a8a63c39743e42a43765a5db0)  
854 [Oksanen/ce62be133614e05a8a63c39743e42a43765a5db0](http://paper/vegan-%3A-Community-Ecology-Package.-R-package-1.8-5-Oksanen/ce62be133614e05a8a63c39743e42a43765a5db0) (accessed 6.3.20).
- 855 Parks, D.H., Imelfort, M., Skennerton, C.T., Hugenholtz, P., Tyson, G.W., 2015. CheckM:  
856 assessing the quality of microbial genomes recovered from isolates, single cells, and  
857 metagenomes. *Genome Res.* 25, 1043–1055. <https://doi.org/10.1101/gr.186072.114>
- 858 Parks, D.H., Tyson, G.W., Hugenholtz, P., Beiko, R.G., 2014. STAMP: statistical analysis of  
859 taxonomic and functional profiles. *Bioinformatics* 30, 3123–3124.  
860 <https://doi.org/10.1093/bioinformatics/btu494>
- 861 Peng, Y., Leung, H.C.M., Yiu, S.M., Chin, F.Y.L., 2012. IDBA-UD: a de novo assembler for  
862 single-cell and metagenomic sequencing data with highly uneven depth. *Bioinformatics*  
863 28, 1420–1428. <https://doi.org/10.1093/bioinformatics/bts174>
- 864 Price, R.E., Giovannelli, D., 2017. A Review of the Geochemistry and Microbiology of Marine  
865 Shallow-Water Hydrothermal Vents, in: *Reference Module in Earth Systems and*  
866 *Environmental Sciences*. Elsevier. <https://doi.org/10.1016/B978-0-12-409548-9.09523-3>
- 867 Reveillaud, J., Reddington, E., McDermott, J., Algar, C., Meyer, J.L., Sylva, S., Seewald, J.,  
868 German, C.R., Huber, J.A., 2016. Subseafloor microbial communities in hydrogen-rich  
869 vent fluids from hydrothermal systems along the Mid-Cayman Rise. *Environ. Microbiol.*  
870 18, 1970–1987. <https://doi.org/10.1111/1462-2920.13173>
- 871 Rey, J., Somoza, L., Martínez-Frías, J., 1995. Tectonic, volcanic, and hydrothermal event sequence  
872 on Deception Island (Antarctica). *Geo-Mar. Lett.* 15, 1–8.  
873 <https://doi.org/10.1007/BF01204491>
- 874 Seemann, T., 2014. Prokka: rapid prokaryotic genome annotation. *Bioinformatics* 30, 2068–2069.  
875 <https://doi.org/10.1093/bioinformatics/btu153>
- 876 Sharp, C.E., Brady, A.L., Sharp, G.H., Grasby, S.E., Stott, M.B., Dunfield, P.F., 2014. Humboldt's  
877 spa: microbial diversity is controlled by temperature in geothermal environments. *ISME J.*  
878 8, 1166–1174. <https://doi.org/10.1038/ismej.2013.237>
- 879 Somoza, L., Martínez-Frías, J., Smellie, J.L., Rey, J., Maestro, A., 2004. Evidence for  
880 hydrothermal venting and sediment volcanism discharged after recent short-lived volcanic  
881 eruptions at Deception Island, Bransfield Strait, Antarctica. *Mar. Geol.* 203, 119–140.  
882 [https://doi.org/10.1016/S0025-3227\(03\)00285-8](https://doi.org/10.1016/S0025-3227(03)00285-8)

- 883 Stanley, S.O., Rose, A.H., Smith, J.E., 1967. Bacteria and yeasts from lakes on Deception Island.  
884 *Philos. Trans. R. Soc. Lond. B. Biol. Sci.* 252, 199–207.  
885 <https://doi.org/10.1098/rstb.1967.0012>
- 886 Takai, K., Komatsu, T., Inagaki, F., Horikoshi, K., 2001. Distribution of Archaea in a Black  
887 Smoker Chimney Structure. *Appl. Environ. Microbiol.* 67, 3618–3629.  
888 <https://doi.org/10.1128/AEM.67.8.3618-3629.2001>
- 889 Torre, J.R.D.L., Walker, C.B., Ingalls, A.E., Könneke, M., Stahl, D.A., 2008. Cultivation of a  
890 thermophilic ammonia oxidizing archaeon synthesizing crenarchaeol. *Environ. Microbiol.*  
891 10, 810–818. <https://doi.org/10.1111/j.1462-2920.2007.01506.x>
- 892 Trembath-Reichert, E., Butterfield, D.A., Huber, J.A., 2019. Active seafloor microbial  
893 communities from Mariana back-arc venting fluids share metabolic strategies across  
894 different thermal niches and taxa. *ISME J.* 13, 2264–2279. <https://doi.org/10.1038/s41396-019-0431-y>
- 896 Tully, B.J., Wheat, C.G., Glazer, B.T., Huber, J.A., 2018. A dynamic microbial community with  
897 high functional redundancy inhabits the cold, oxic seafloor aquifer. *ISME J.* 12, 1–16.  
898 <https://doi.org/10.1038/ismej.2017.187>
- 899 Turnbaugh, P.J., Gordon, J.I., 2009. The core gut microbiome, energy balance and obesity. *J.*  
900 *Physiol.* 587, 4153–4158. <https://doi.org/10.1113/jphysiol.2009.174136>
- 901 Várbiro, G., Görgényi, J., Tóthmérész, B., Padisák, J., Hajnal, É., Borics, G., 2017. Functional  
902 redundancy modifies species–area relationship for freshwater phytoplankton. *Ecol. Evol.*  
903 7, 9905–9913. <https://doi.org/10.1002/ece3.3512>
- 904 Wang, H., Sun, L., 2017. Comparative metagenomics reveals insights into the deep-sea adaptation  
905 mechanism of the microorganisms in Iheya hydrothermal fields. *World J. Microbiol.*  
906 *Biotechnol.* 33, 86. <https://doi.org/10.1007/s11274-017-2255-0>
- 907 Ward, L., Taylor, M.W., Power, J.F., Scott, B.J., McDonald, I.R., Stott, M.B., 2017. Microbial  
908 community dynamics in Inferno Crater Lake, a thermally fluctuating geothermal spring.  
909 *ISME J.* 11, 1158–1167. <https://doi.org/10.1038/ismej.2016.193>
- 910 Wei, S.T.S., Lacap-Bugler, D.C., Lau, M.C.Y., Caruso, T., Rao, S., de los Rios, A., Archer, S.K.,  
911 Chiu, J.M.Y., Higgins, C., Van Nostrand, J.D., Zhou, J., Hopkins, D.W., Pointing, S.B.,  
912 2016. Taxonomic and Functional Diversity of Soil and Hypolithic Microbial Communities  
913 in Miers Valley, McMurdo Dry Valleys, Antarctica. *Front. Microbiol.* 7.  
914 <https://doi.org/10.3389/fmicb.2016.01642>
- 915 Wickham, H., 2011. ggplot2. *WIREs Comput. Stat.* 3, 180–185. <https://doi.org/10.1002/wics.147>
- 916 Wilke, A., Harrison, T., Wilkening, J., Field, D., Glass, E.M., Kyrpides, N., Mavrommatis, K.,  
917 Meyer, F., 2012. The M5nr: a novel non-redundant database containing protein sequences  
918 and annotations from multiple sources and associated tools. *BMC Bioinformatics* 13, 141.  
919 <https://doi.org/10.1186/1471-2105-13-141>
- 920 Wu, Y.-W., Simmons, B.A., Singer, S.W., 2016. MaxBin 2.0: an automated binning algorithm to  
921 recover genomes from multiple metagenomic datasets. *Bioinformatics* 32, 605–607.  
922 <https://doi.org/10.1093/bioinformatics/btv638>
- 923 Xie, W., Wang, F., Guo, L., Chen, Z., Sievert, S.M., Meng, J., Huang, G., Li, Y., Yan, Q., Wu, S.,  
924 Wang, X., Chen, S., He, G., Xiao, X., Xu, A., 2011. Comparative metagenomics of  
925 microbial communities inhabiting deep-sea hydrothermal vent chimneys with contrasting  
926 chemistries. *ISME J.* 5, 414–426. <https://doi.org/10.1038/ismej.2010.144>
- 927 Zhang, J.-Z., Millero, F.J., 1993. The products from the oxidation of H<sub>2</sub>S in seawater. *Geochim.*  
928 *Cosmochim. Acta* 57, 1705–1718. [https://doi.org/10.1016/0016-7037\(93\)90108-9](https://doi.org/10.1016/0016-7037(93)90108-9)  
929

930

## 931 **Figures legends**

932

933

934 Figure 1. The sampling map with the location of Antarctic Peninsula (A) and Deception Island,  
935 with Fumarole Bay and Whalers Bay geothermal sites highlighted (B). Distribution of collected  
936 samples across environmental gradients at studied geothermal sites are described in C for Fumarole  
937 Bay and D for Whalers Bay. *In situ* temperatures are represented in blue (glaciers) and orange  
938 (fumaroles). The arrow indicates the direction of low and high values of temperature, salinity and  
939 volcanic compounds, such as sulfate. Figure was retrieved from Bendia et al., 2018b.

940

941 Figure 2. Relative abundances of microbial community taxonomy based on annotation of reads  
942 from shotgun metagenomics, represented at phylum (A) and class (B) levels. Environmental  
943 temperatures and geothermal sites of each sample are represented. Taxonomy assignments were  
944 performed based on best hit classifications and M5NR (non-redundant protein database), with an  
945 e-value of  $<1 \times 10^{-5}$ , minimum 50 bp alignment, and 60% identity. Co-occurrence network analysis  
946 at the genus level are represented in (C), grouping triplicates of each sampling point and  
947 highlighting the increases of environmental temperatures and complexity. Complexity was  
948 calculated based on a set of measures, such as the number of nodes and edges, modularity, the  
949 number of communities, average node connectivity, average path length, diameter, and cumulative  
950 degree distribution.

951

952 Figure 3. Extended error plots for functional general profiles of microbial communities generated  
953 through annotation of metagenomic reads, visualized through STAMP based on SEED  
954 subsystems, are represented in (A). The *p* values were calculated using Fisher's exact two-sided  
955 test and the confidence intervals were calculated by the method from Newcombe-Wilson.  
956 Differences were considered significant at  $p < 0.05$ . PCA ordination was performed based on  
957 functions at level 3 of the SEED subsystem (B). Heatmap is representing relative abundances of  
958 level 1 functions (C). Samples are clustered and colored according to environmental temperature,  
959 following the three different groups: 98 °C fumarole, <80 °C fumaroles and glaciers.

960

961 Figure 4. Extended error plots for functional profiles regarding metabolic pathways, including  
962 sulfur, nitrogen and carbon metabolisms, and stress response, including oxidative and osmotic,  
963 and heat/cold shock responses. Profiles were visualized through STAMP based on annotation of  
964 metagenomic reads using SEED subsystems. The  $p$  values are represented and were calculated  
965 using Fisher's exact two-sided test, with the confidence intervals calculated by the method from  
966 Newcombe-Wilson. Samples are clustered and colored according to environmental temperature,  
967 following the three different groups: 98 °C fumaroles, <80 °C fumaroles and glaciers.

968  
969 Figure 5. Spearman correlation between taxonomic profile (A) (phylum level) and functional  
970 profile (level 1 SEED subsystem) (B) and environmental parameters. Only parameters that  
971 exhibited  $p < 0.05$  in a correlation analysis are represented. The environmental parameters are:  
972 Temp (temperature), pH, EC (electrical conductivity), B, Cu, Fe, Zn, OM (organic matter), OC  
973 (organic carbon), P, Si, Na, K, Ca, Mg, sulfate, nitrogen, ammonia, nitrate, sand, silt, and clay.

974  
975 Figure 6. Functional annotation of the 11 selected metagenome-assembled genomes (MAGs),  
976 including metabolic potential (A) and adaptive strategies (B). A black circle represents the  
977 presence of genes or complete gene cluster/pathway, and a yellow circle represents incomplete  
978 gene cluster or pathway. MAGs codes are represented on the upper side of figures, whereas their  
979 taxonomic classification based on GTDB-Tk and GhostKoala are at the bottom. Genes are  
980 presented here with identifiers of KEGG Orthology (KO), Clusters of Orthologous Groups (COG)  
981 or Enzyme Commission numbers (EC).

## 982 983 **Table legends**

984  
985 Table 1. List of the 11 selected MAGs and their taxonomic classification based on GTDB-Tk and  
986 GhostKoala. Characteristics of total genome length, N50, GC content, redundancy and  
987 completeness (based on CheckM), and the genome quality status, are described.

988  
989  
990  
991

## 992 **Supplementary Figures and Tables**

993

994 Figure S1. Relative abundances of microbial community taxonomy based on annotation of contigs,  
995 represented at the phylum level. Contigs were constructed through IDBA-ud and annotated using  
996 the Integrated Microbial Genomes & Microbiomes (IMG/M) system.

997

998 Figure S2. Extended error plots for functional profiles regarding DNA repair, helicase and  
999 topoisomerase, protein biosynthesis, and transport and chemotaxis. Profiles were visualized  
1000 through STAMP based on annotation of metagenomic reads using SEED subsystems. The *p* values  
1001 are represented and were calculated using Fisher's exact two-sided test, with the confidence  
1002 intervals calculated by the method from Newcombe-Wilson. Samples are clustered and colored  
1003 according to environmental temperature, following the three different groups: 98 °C fumarole, <80  
1004 °C fumaroles and glaciers.

1005

1006 Figure S3. A circular view of the 158 metagenome-assembled genomes (MAGs) that were  
1007 recovered through anvi'o v. 5 pipeline and are represented with the mean coverage of contigs, and  
1008 the MAGs redundancy, completeness, GC content, total reads mapped and number of SNVs  
1009 reported. The clustering dendrogram in the center shows the hierarchical clustering of contigs  
1010 based on their sequence composition, and their distribution across samples.

1011

1012 Figure S4. Heatmap representing the 13 high quality and 82 medium quality MAGs based on read  
1013 mapping per sample with Z-score. Samples are clustered and colored according to environmental  
1014 temperature, following the three different groups: 98 °C fumarole, <80 °C fumaroles and glaciers.

1015

1016

1017 Table S1. Physical-chemical parameters data per sample including temperature, pH, EC (electrical  
1018 conductivity), B, Cu, Fe, Zn, OM (organic matter), OC (organic carbon), P, Si, Na, K, Ca, Mg,  
1019 sulfate, nitrogen, ammonia, nitrate, sand, silt, and clay.

1020

1021 Table S2. General information about reads and contigs annotation.

1022

1023 Table S3. *P*-values of Spearman correlations comparing taxonomic and functional profiles with  
1024 the environmental data.

1025

1026 Table S4. A complete list of all reconstructed MAGs with their characteristics: taxonomic  
1027 classification based on GTDB-Tk and GhostKoala, the total genome length, N50, GC content,  
1028 redundancy and completeness, based on anvi'o and CheckM, and the genome quality status.

FIGURE 1

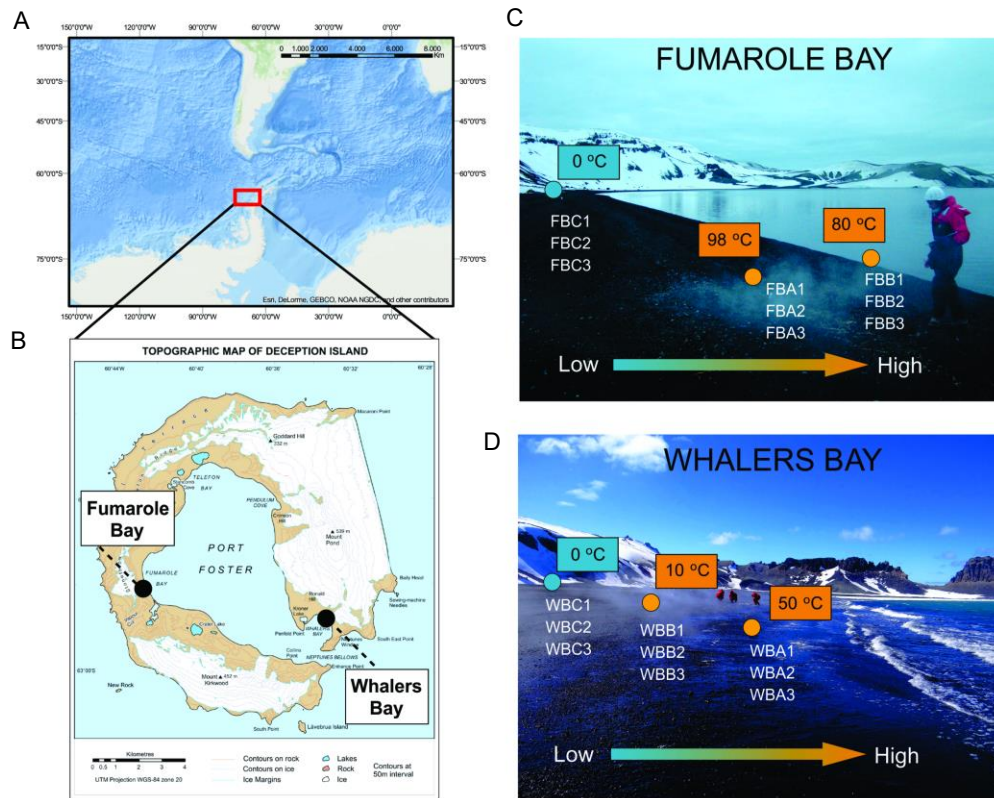



FIGURE 2

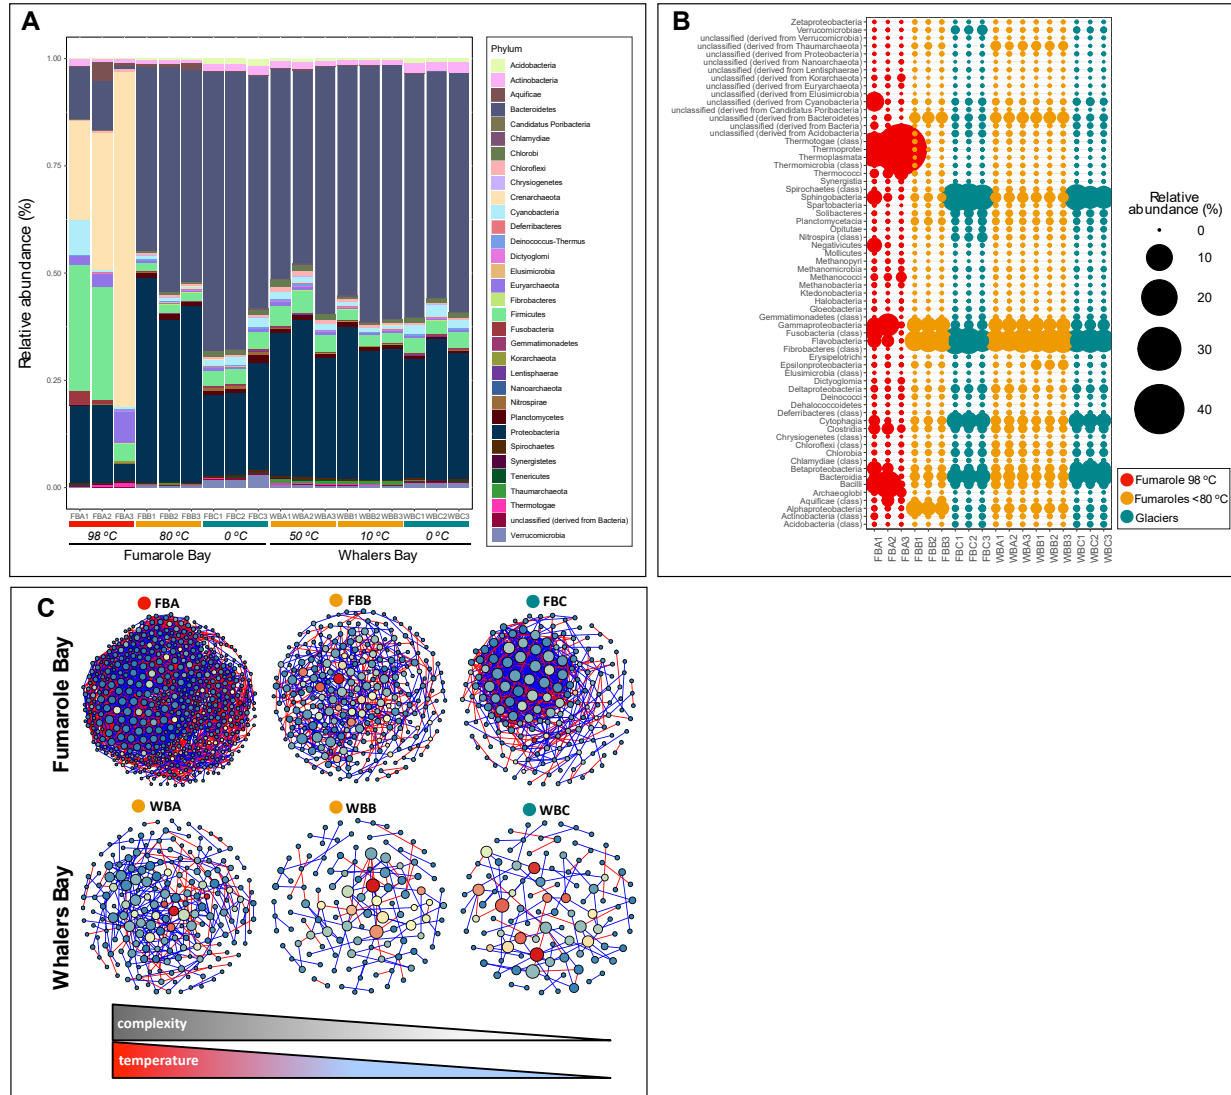

FIGURE 3

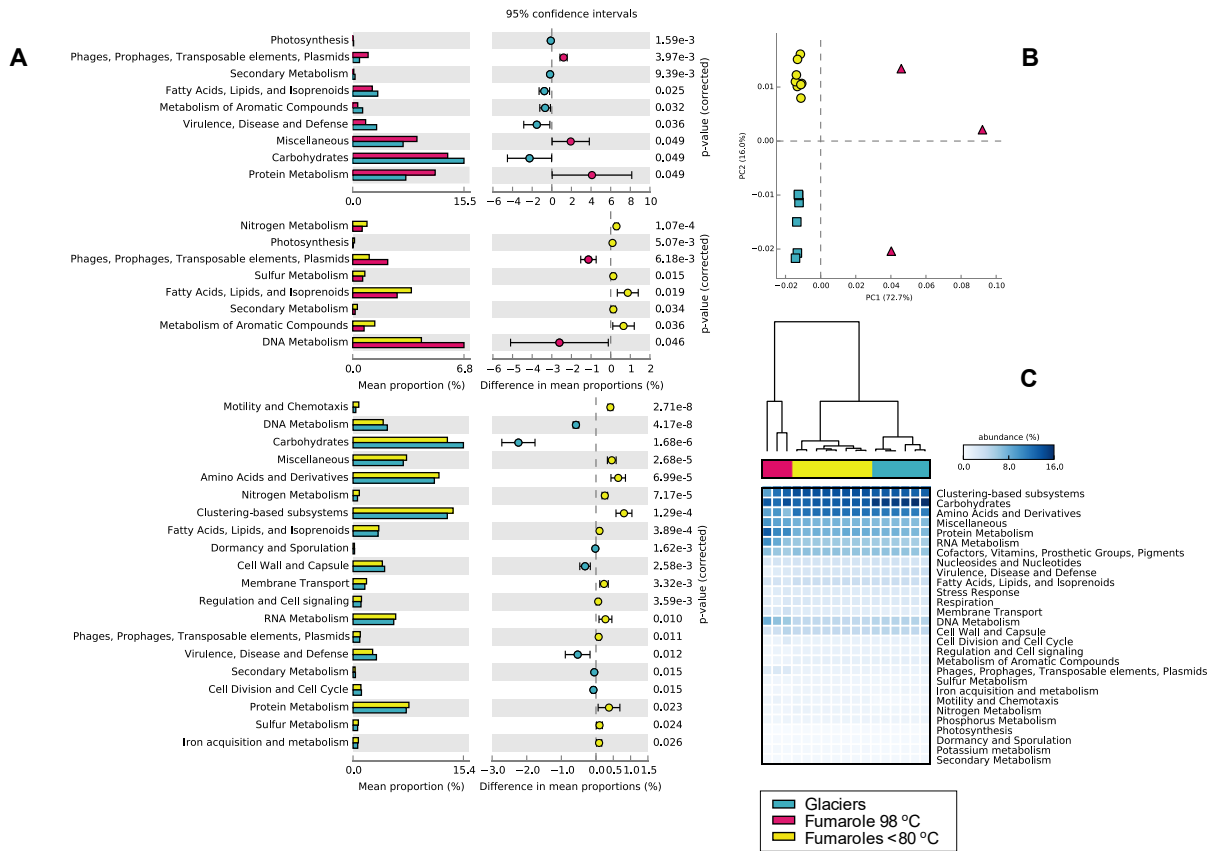

FIGURE 4

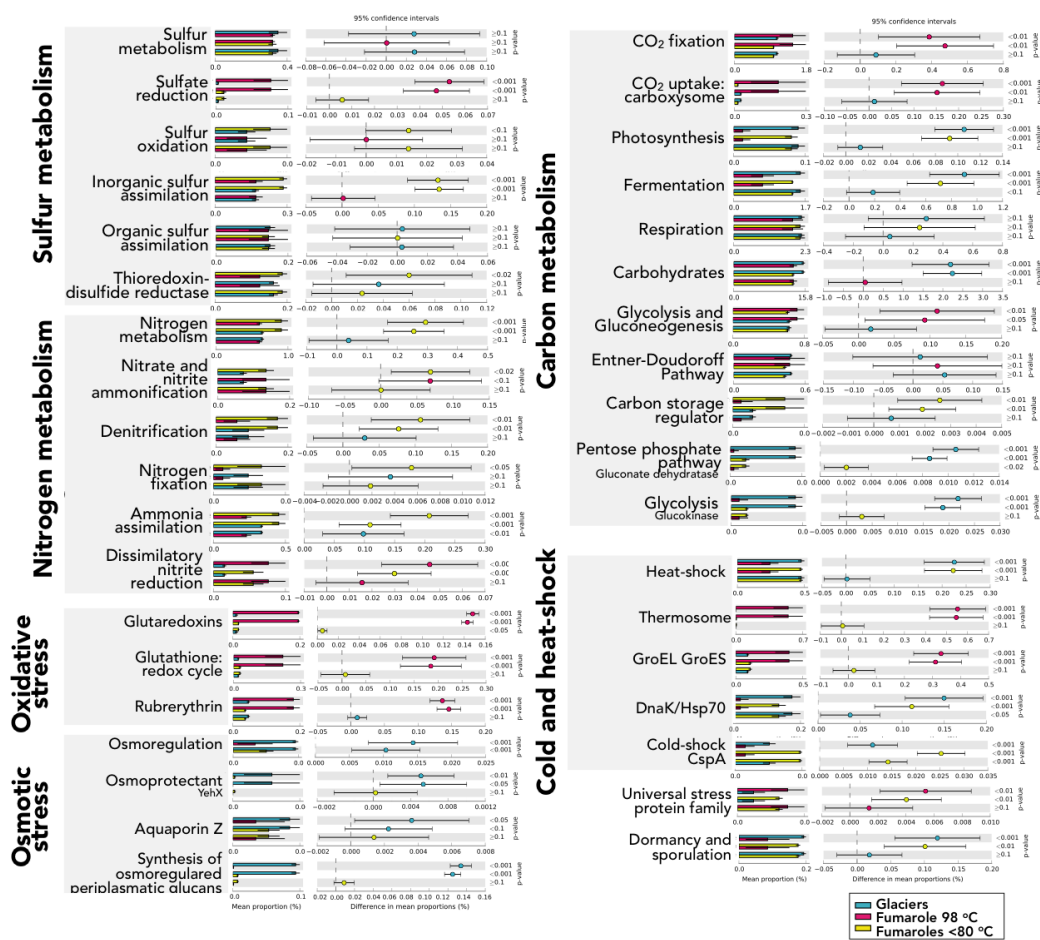

FIGURE 5

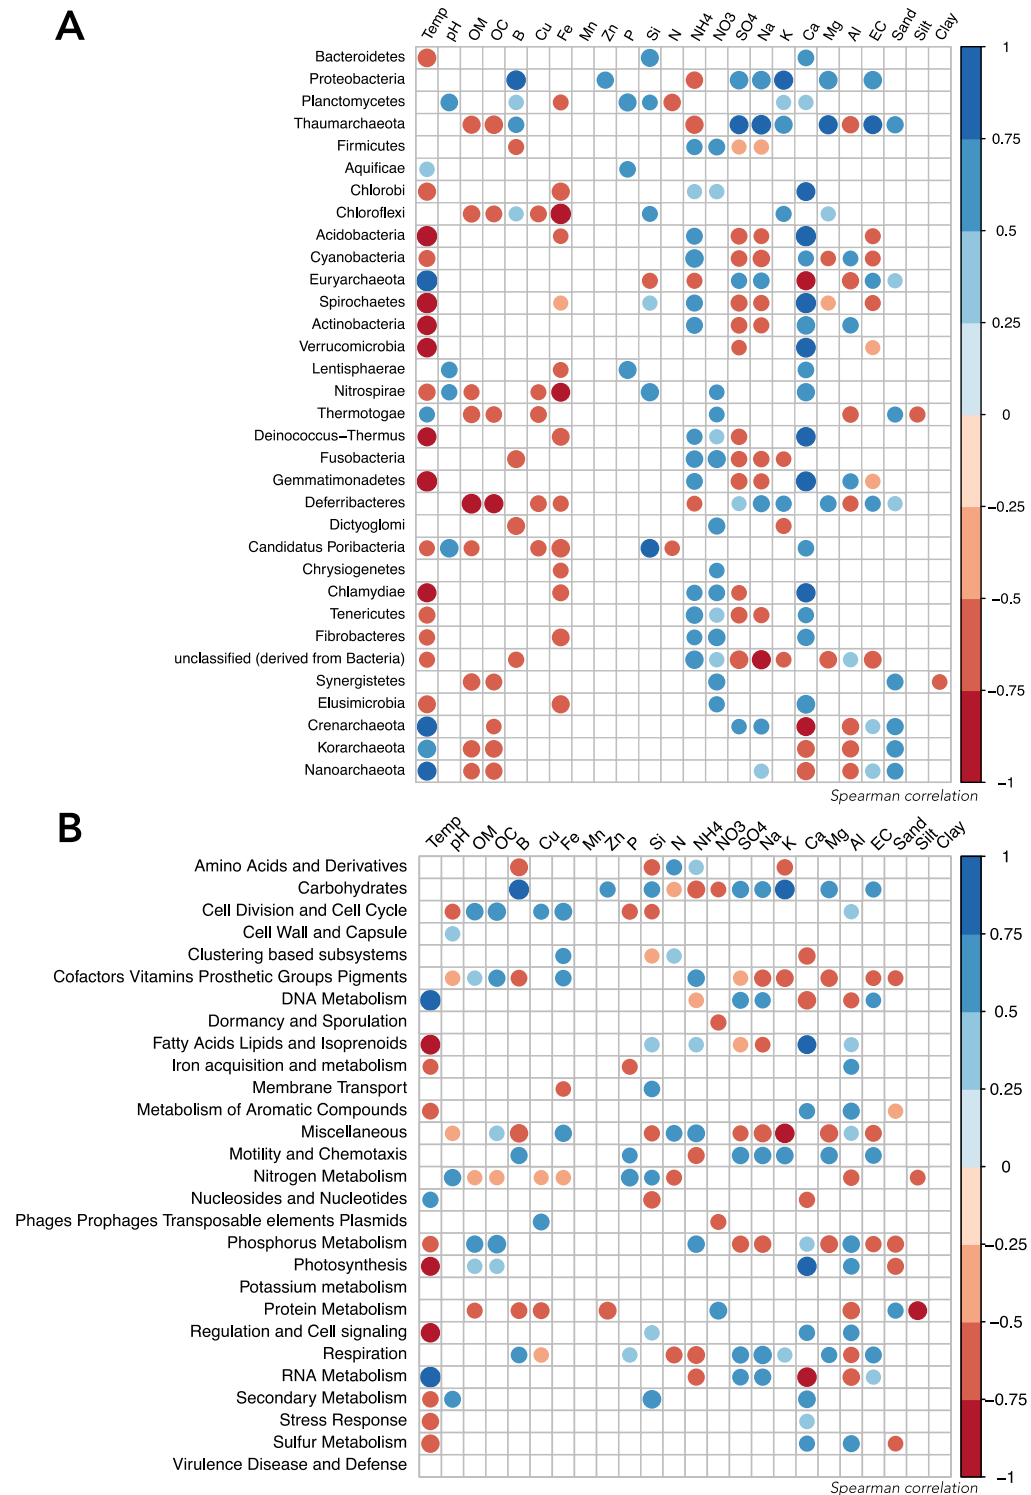

FIGURE 6

A

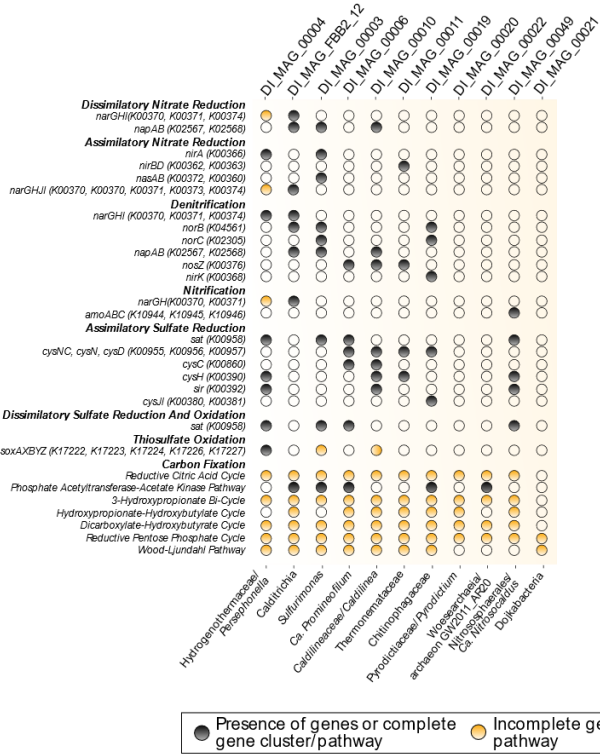

B

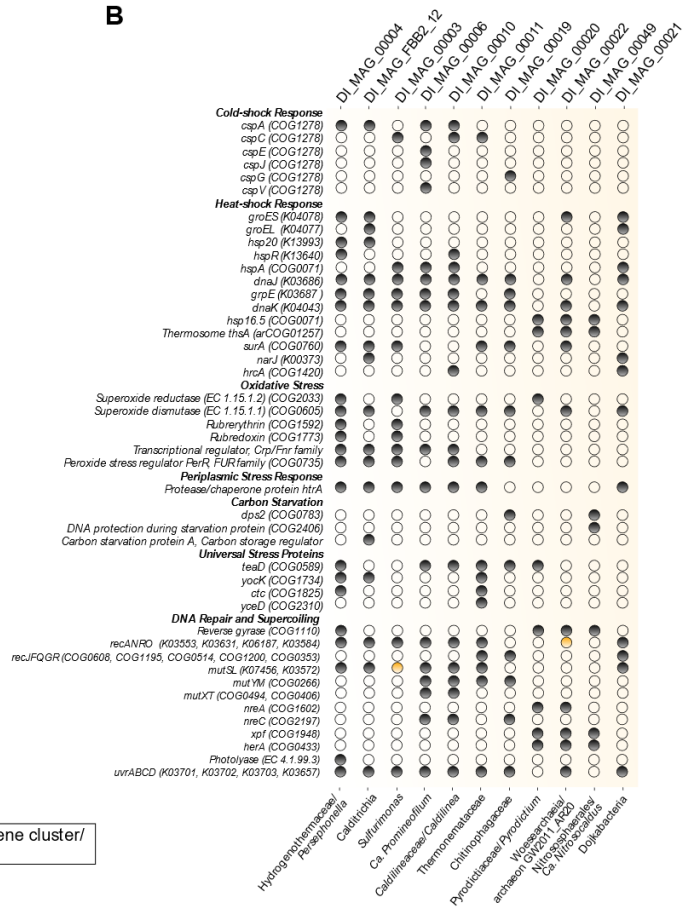

TABLE 1

| MAG Code       | KEGG/Ghost<br>Koala taxonomy        | GTDB-Tk taxonomy                                                                                           | Total<br>Length | Contigs<br>number | N50     | GC<br>content | Completeness | Redundancy | Draft<br>Quality |
|----------------|-------------------------------------|------------------------------------------------------------------------------------------------------------|-----------------|-------------------|---------|---------------|--------------|------------|------------------|
| DI_MAG_00003   | <i>Sulfurimonas</i>                 | Bacteria; Campylobacterota;<br>Campylobacteria;<br>Campylobacterales; Thiovulaceae;<br><i>Sulfurimonas</i> | 1,912,170       | 94                | 32,276  | 39.42         | 97.95        | 0.41       | High             |
| DI_MAG_00004   | <i>Persephonella</i>                | Bacteria; Aquificota; Aquificae;<br>Hydrogenothermales;<br>Hydrogenothermaceae                             | 1,682,998       | 67                | 44,923  | 30.32         | 98.37        | 0.22       | High             |
| DI_MAG_00006   | <i>Candidatus<br/>Promineofilum</i> | Bacteria; Chloroflexota;<br>Anaerolineae; Promineofilales;<br>Promineofilaceae                             | 4,660,983       | 56                | 102,288 | 52.27         | 92.73        | 2.00       | High             |
| DI_MAG_00010   | <i>Caldilinea</i>                   | Bacteria; Chloroflexota;<br>Anaerolineae; Caldilineales;<br>Caldilineaceae                                 | 4,473,267       | 92                | 90,197  | 57.82         | 96.36        | 0.91       | High             |
| DI_MAG_00011   | Unknown                             | Bacteria; Bacteroidota; Bacteroidia;<br>Cytophagales; Thermonemataceae                                     | 2,518,210       | 152               | 22,003  | 49.00         | 88.43        | 0.55       | High             |
| DI_MAG_00019   | Unknown                             | Bacteria; Bacteroidota; Bacteroidia;<br>Chitinophagales; Chitinophagaceae                                  | 3,082,789       | 324               | 10,795  | 37.53         | 62.85        | 7.88       | Medium           |
| DI_MAG_00020   | <i>Pyrodictium</i>                  | Archaea; Crenarchaeota;<br>Thermoprotei; Desulfurococcales;<br>Pyrodictiaceae                              | 1,071,537       | 28                | 68,816  | 47.76         | 75.27        | 0.47       | Medium           |
| DI_MAG_00021   | Unknown                             | Bacteria; Patescibacteria;<br>Dojkabacteria                                                                | 734,971         | 8                 | 176,471 | 31.53         | 77.27        | 1.72       | Medium           |
| DI_MAG_00022   | archaeon<br>GW2011_AR20             | Archaea; Nanoarchaeota;<br>Woesearchaeia                                                                   | 1,155,662       | 40                | 83,443  | 44.63         | 79.44        | 0.00       | Medium           |
| DI_MAG_00049   | <i>Candidatus<br/>Nitrosocaldus</i> | Archaea; Crenarchaeota;<br>Nitrososphaeria; Nitrososphaerales                                              | 982,006         | 145               | 6,877   | 32.09         | 60.52        | 1.94       | Medium           |
| DI_MAG_FBB2_12 | <i>Caldithrix</i>                   | Bacteria; Caldithrichota; Caldithrichia                                                                    | 2,931,548       | 176               | 21,244  | 39.10         | 95.54        | 0.00       | High             |
